# Supplementary material for: Assessing the long term impact of power plant emissions on regional air pollution using extensive monitoring data
Source: Royal Society of Chemistry journal article supplement (doi:10.1039/b812680a), 2008-12-18
Supplement: b812680a.pdf [file b812680a.pdf]

Supplementary information for the manuscript:

Assessing the long term impact of power plants emissions on  
regional air pollution using extensive monitoring data

Yuval, David M. Broday

November 2, 2008

Number of pages: 39

Number of tables: 0

Number of figures: 38

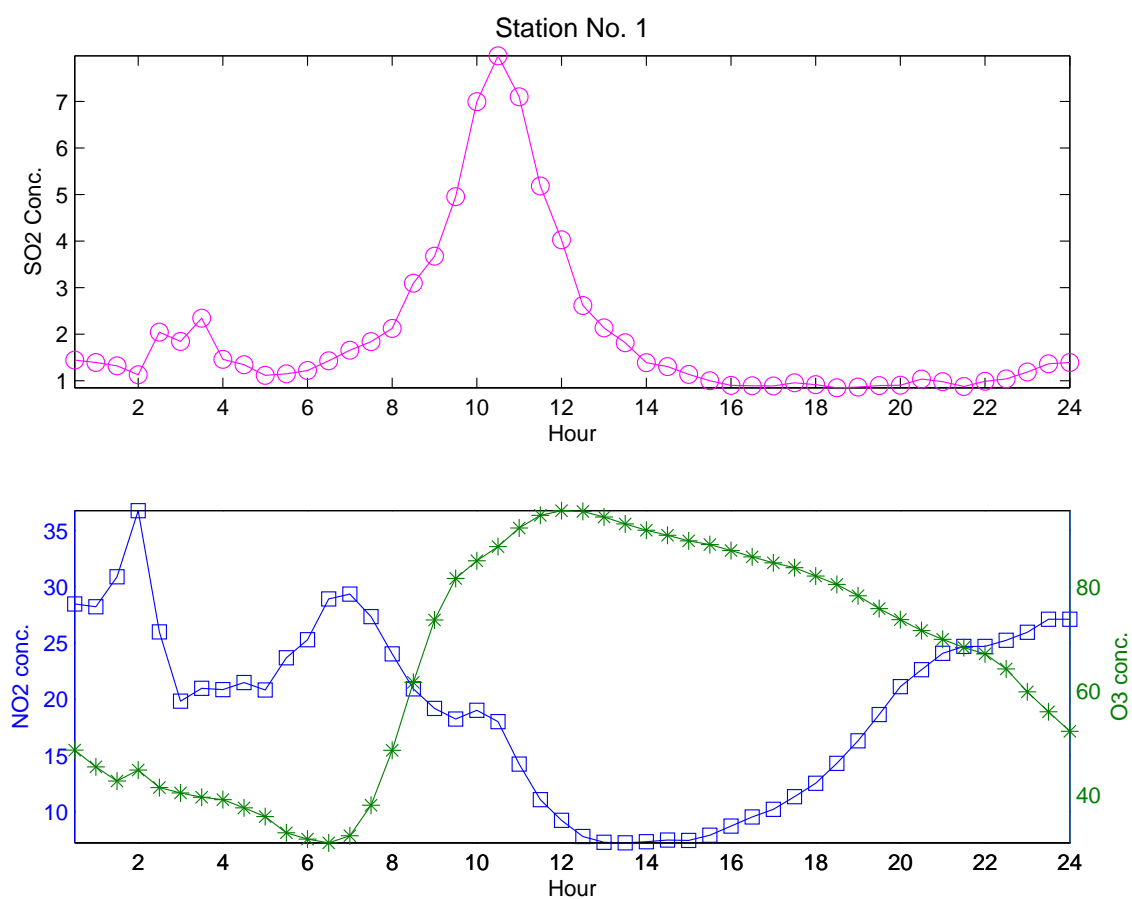

Figure S1: (upper panel) The daily cycles of the mean  $\text{SO}_2$  concentration ( $\mu\text{g m}^{-3}$ ) in station 1. (lower panel) The daily cycle of the mean  $\text{NO}_2$  (squares) and mean  $\text{O}_3$  (stars) concentrations ( $\mu\text{g m}^{-3}$ ) in station 1.

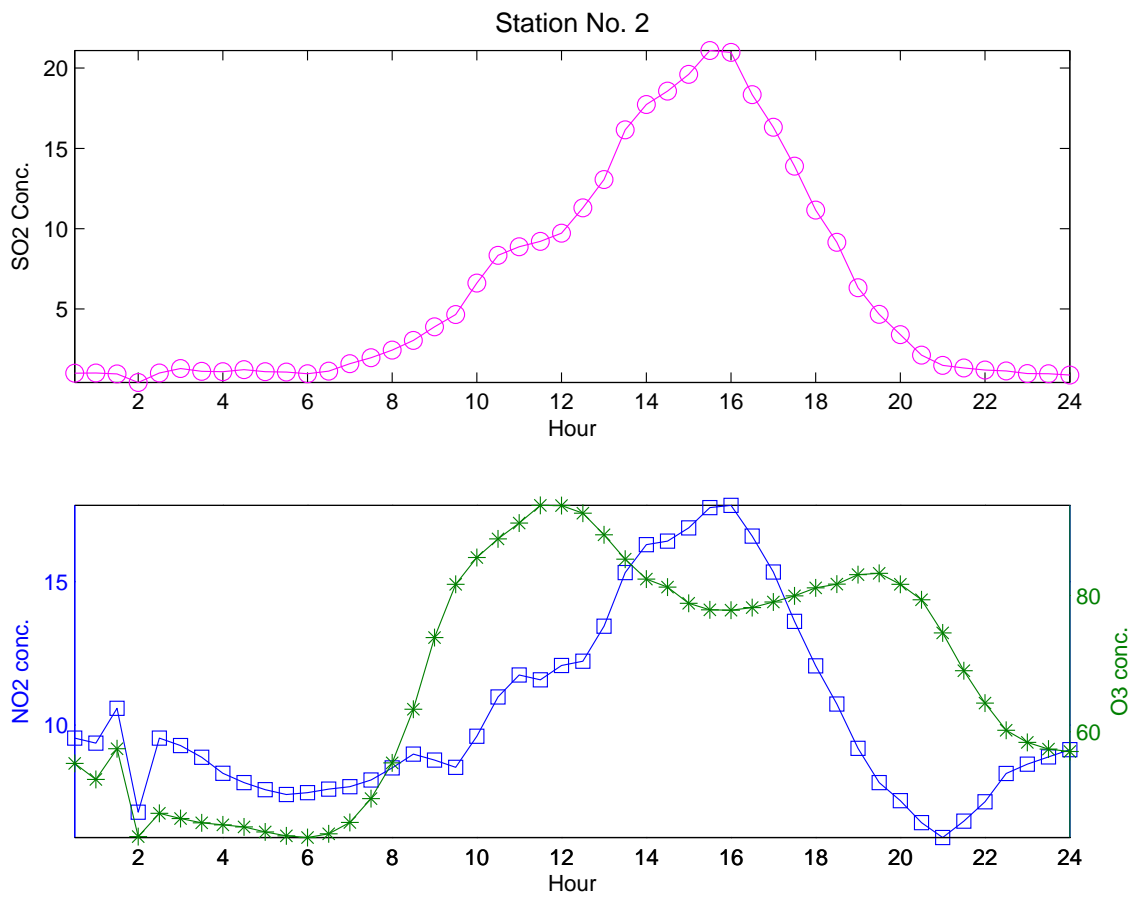

Figure S2: Like Fig. S1 but for station 2.

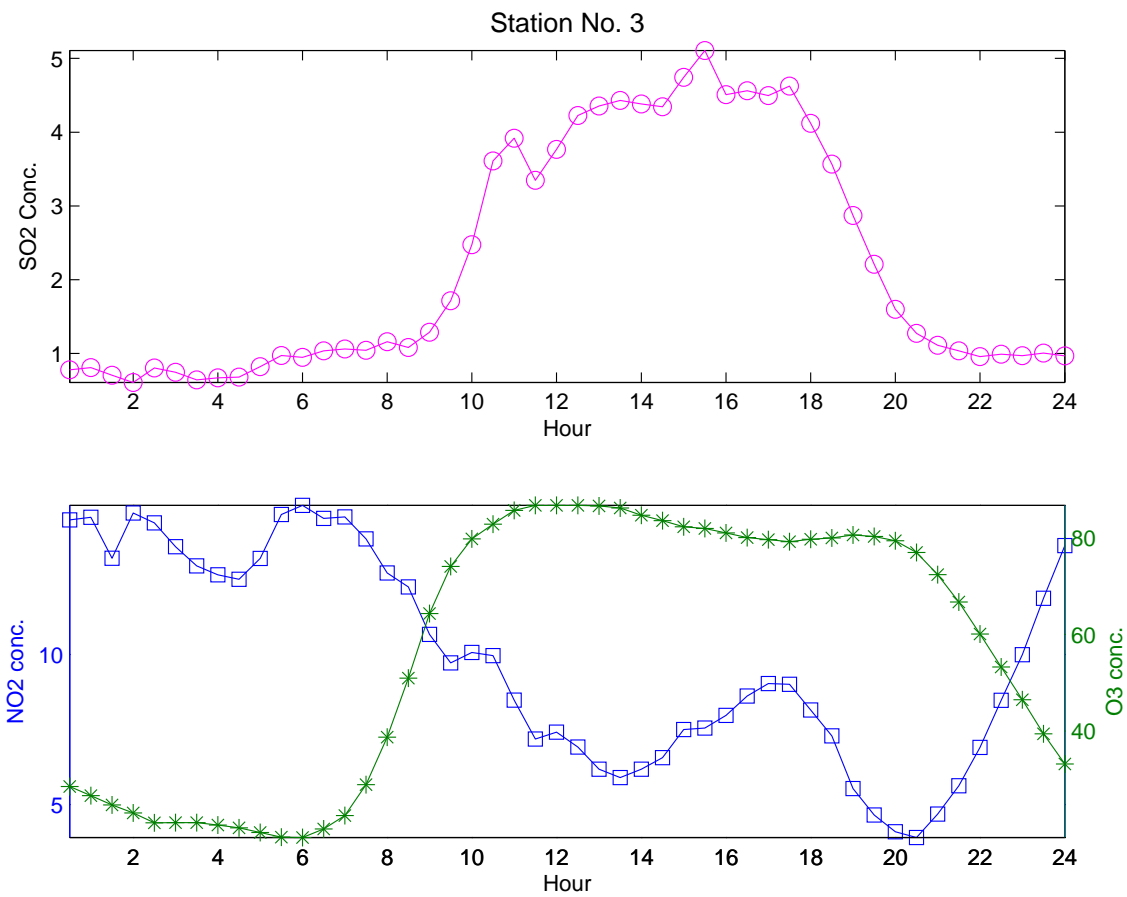

Figure S4: Like Fig. S1 but for station 3.

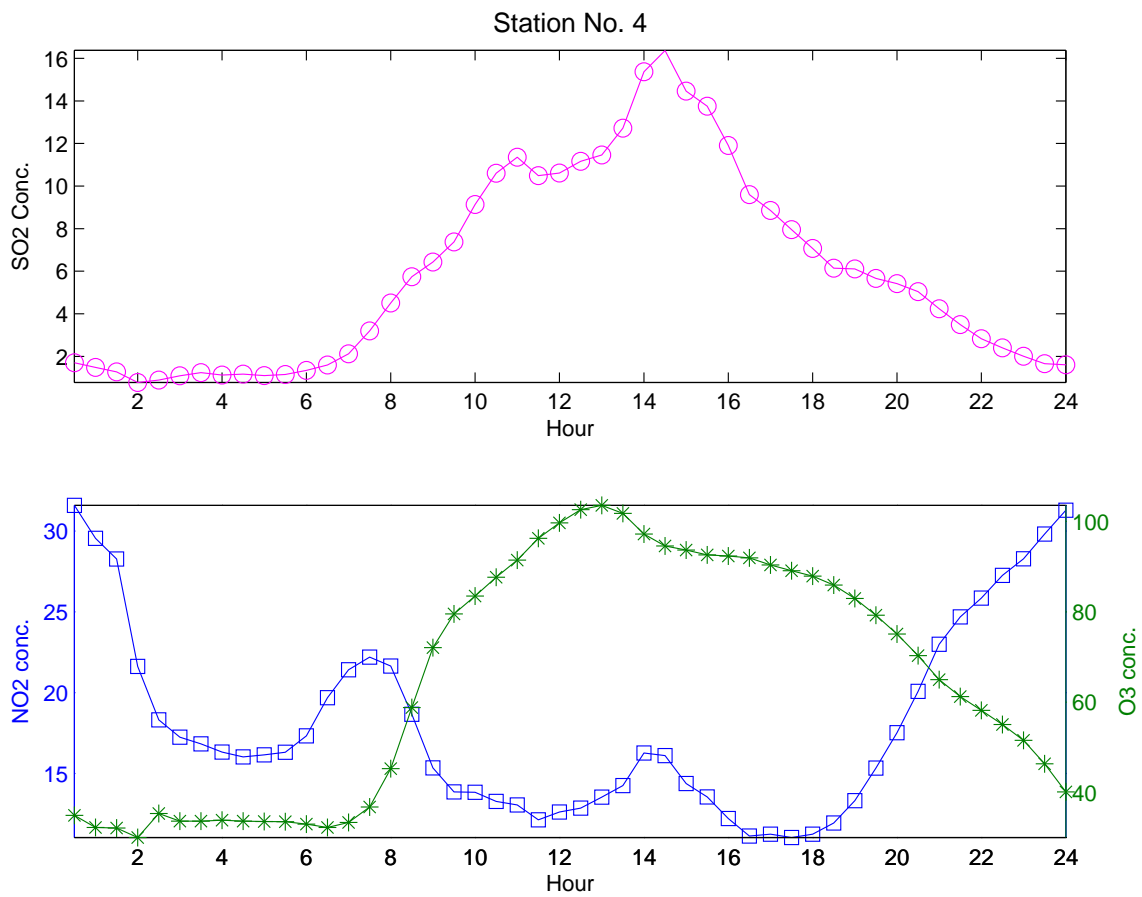

Figure S5: Like Fig. S1 but for station 4.

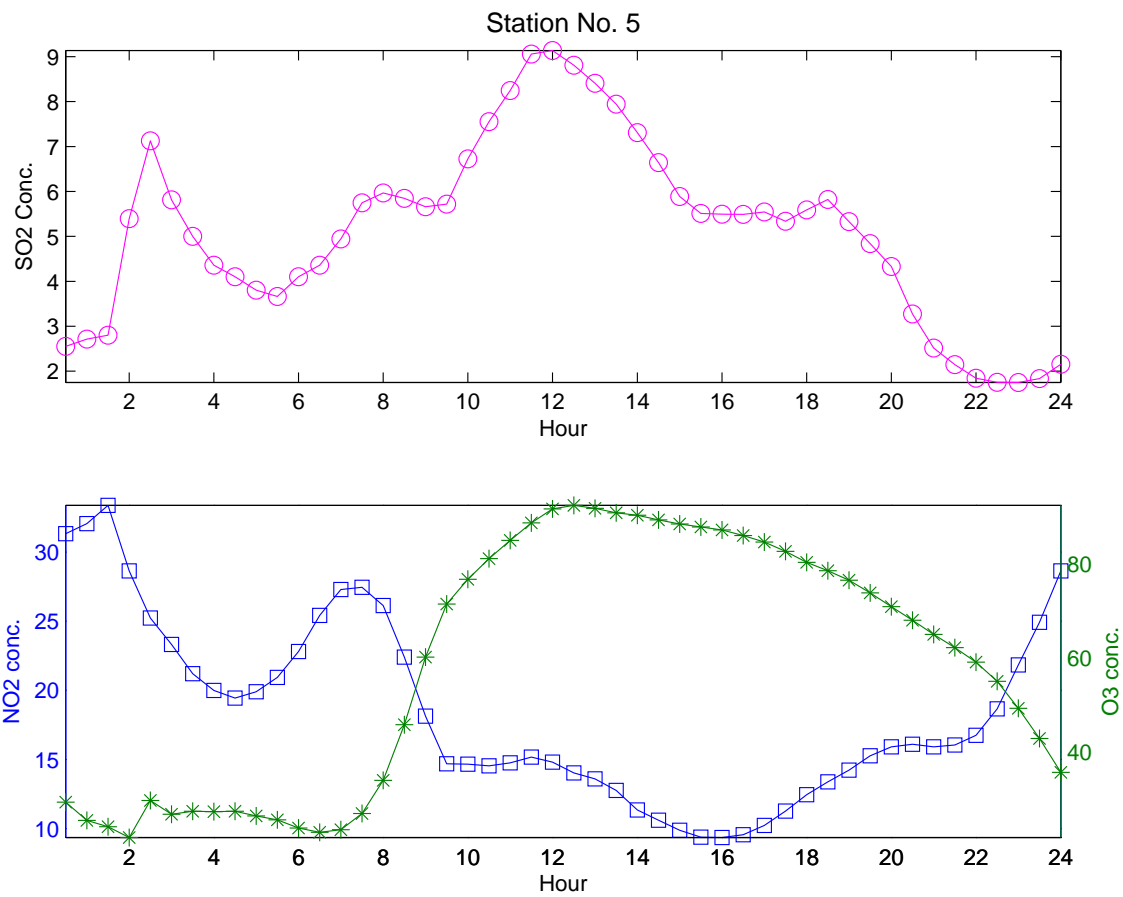

Figure S6: Like Fig. S1 but for station 5.

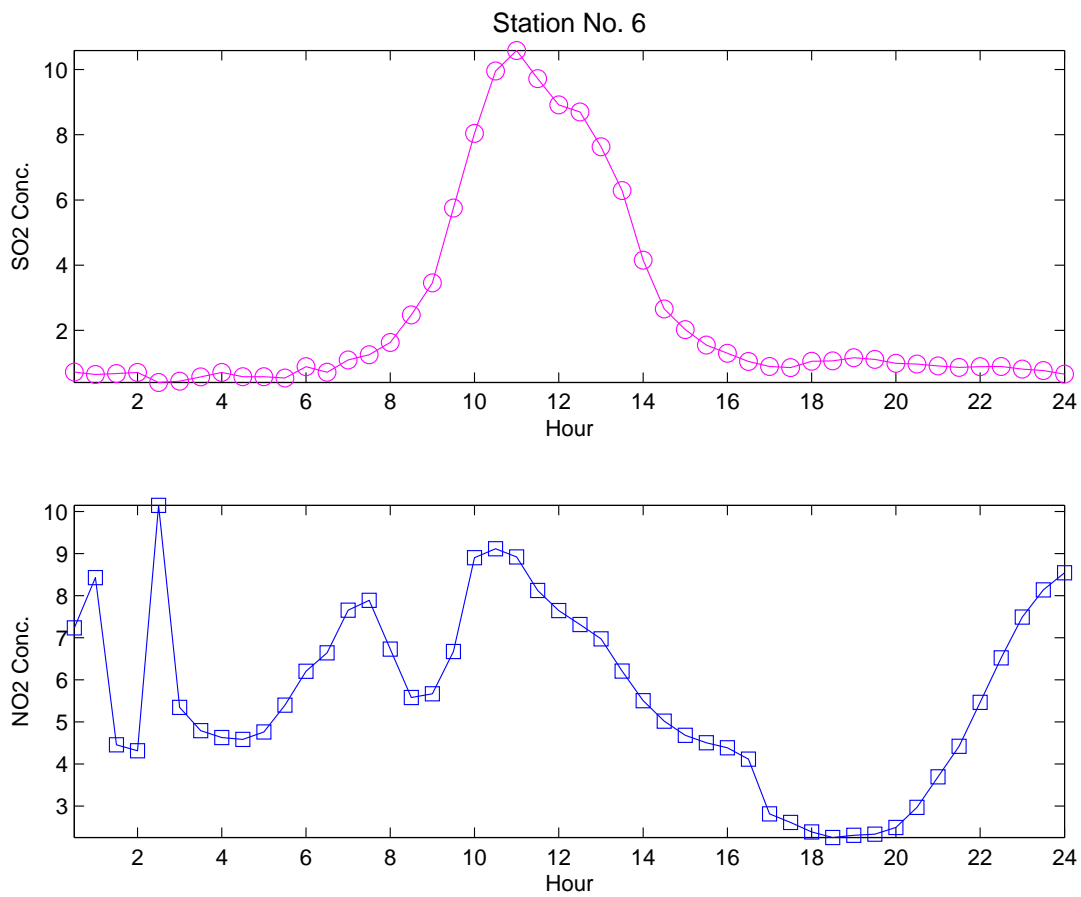

Figure S7: Like Fig. S1 but for station 6.

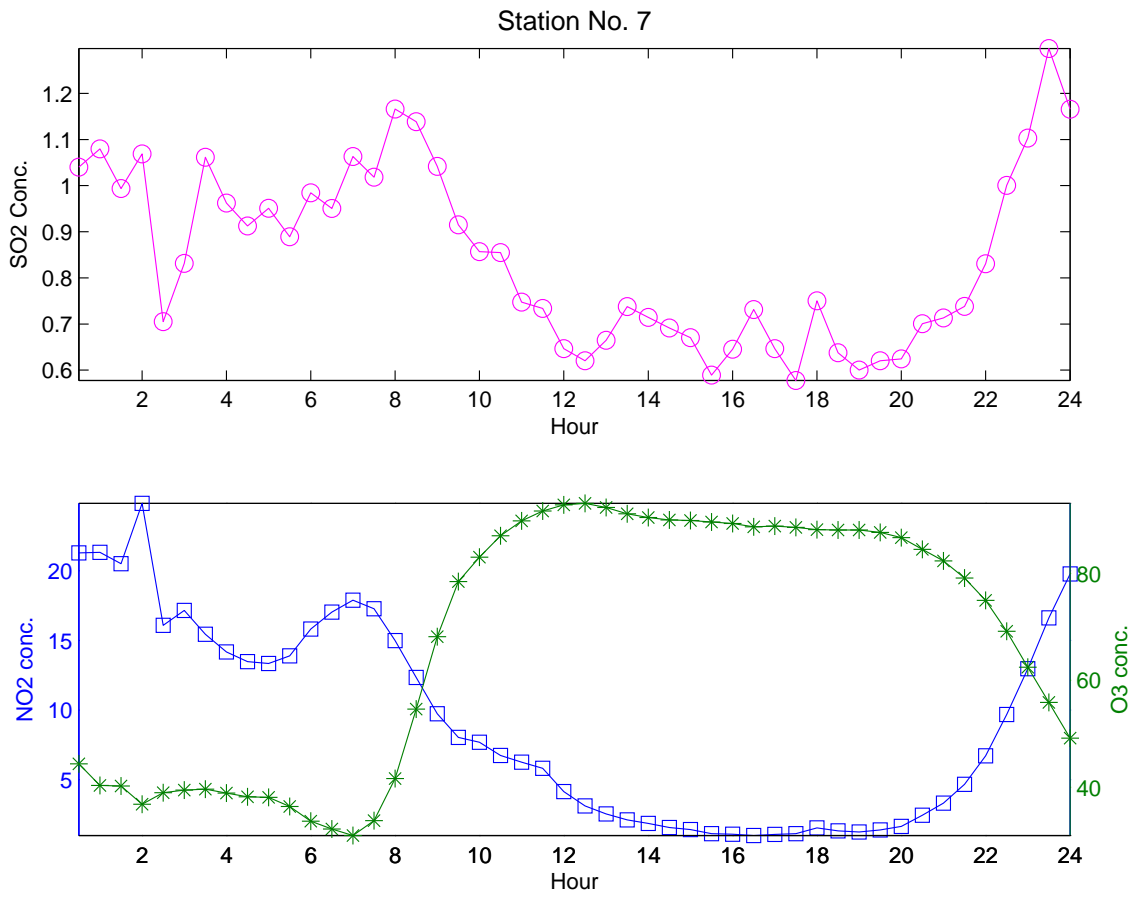

Figure S7: Like Fig. S1 but for station 7.



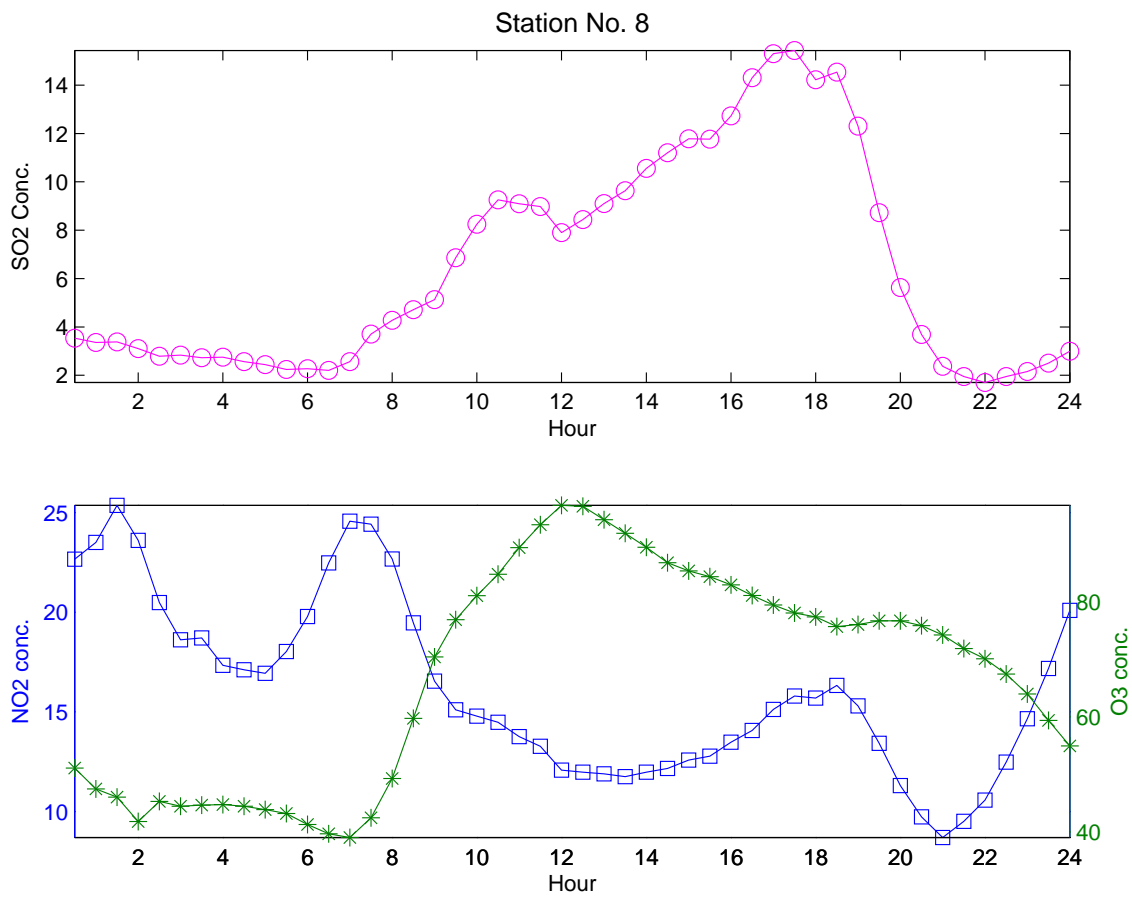

Figure S8: Like Fig. S1 but for station 8.

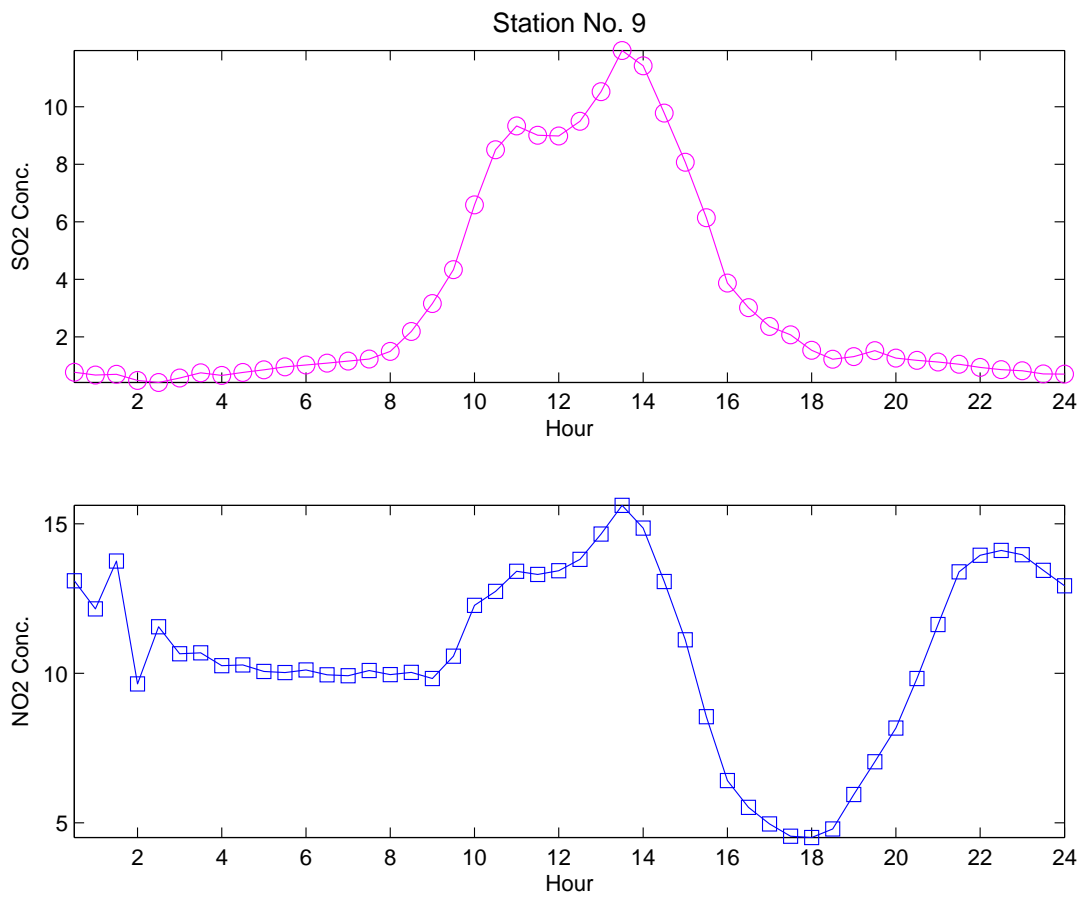

Figure S9: Like Fig. S1 but for station 9.

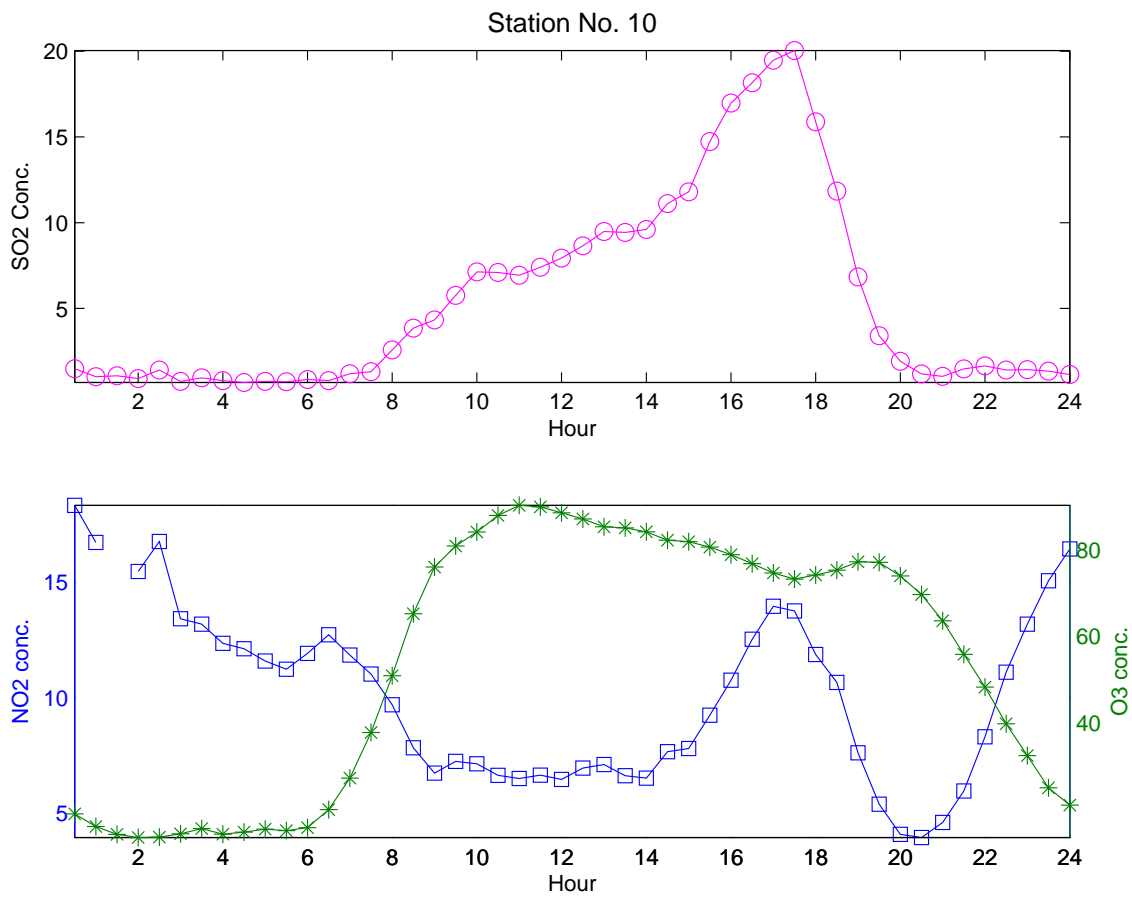

Figure S10: Like Fig. S1 but for station 10.

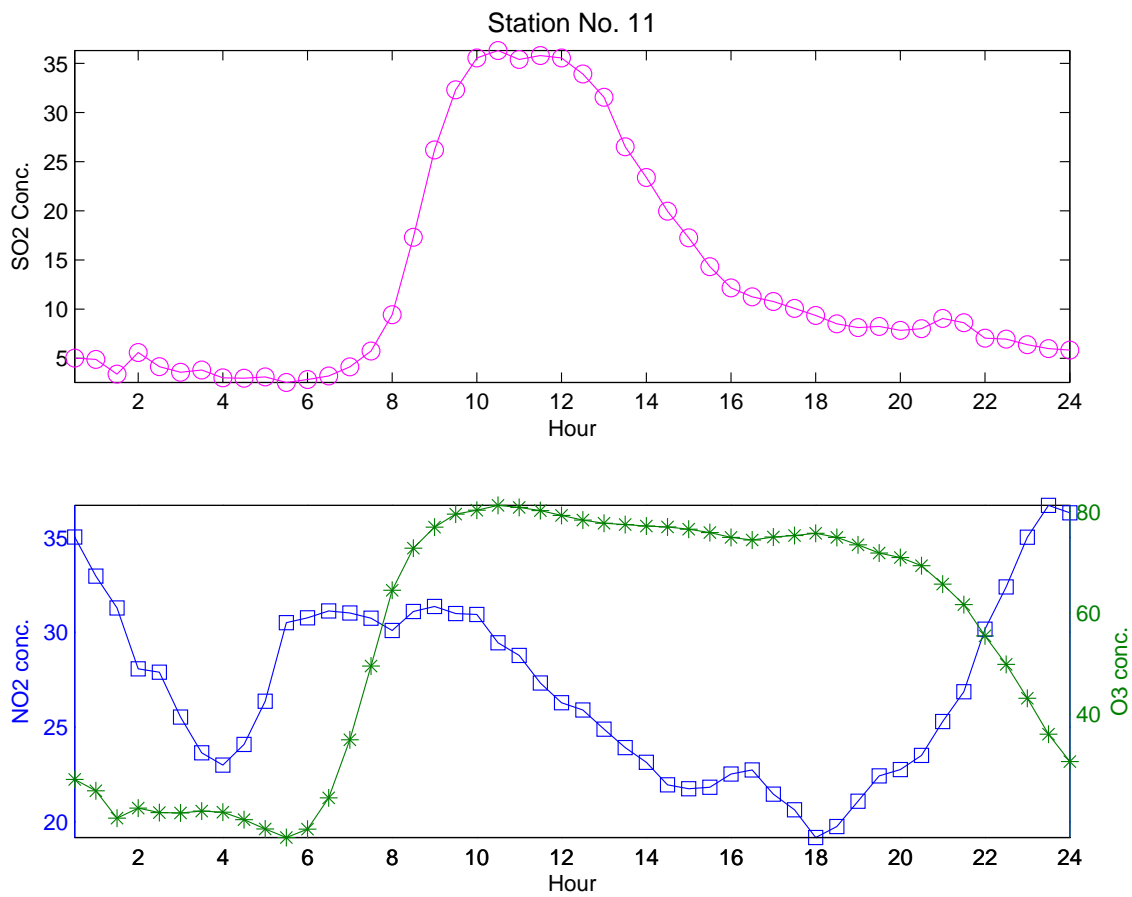

Figure S11: Like Fig. S1 but for station 11.

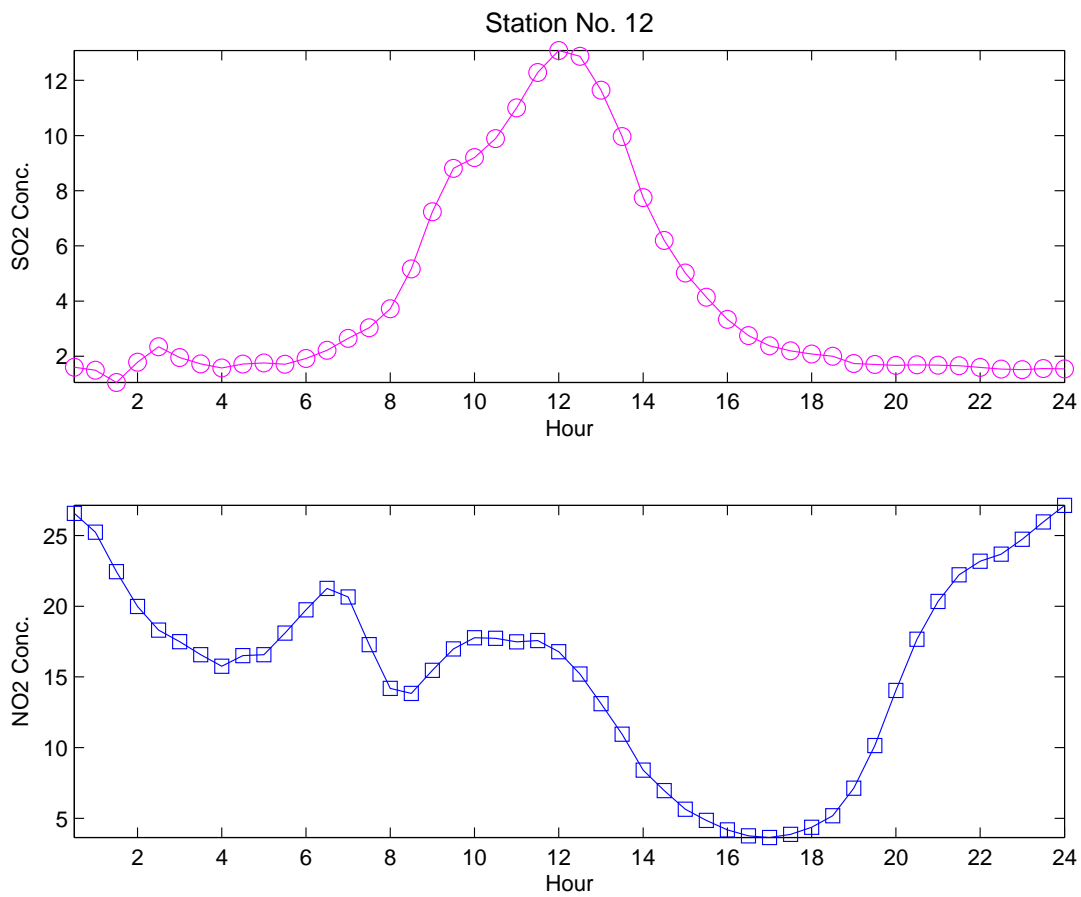

Figure S12: Like Fig. S1 but for station 12.

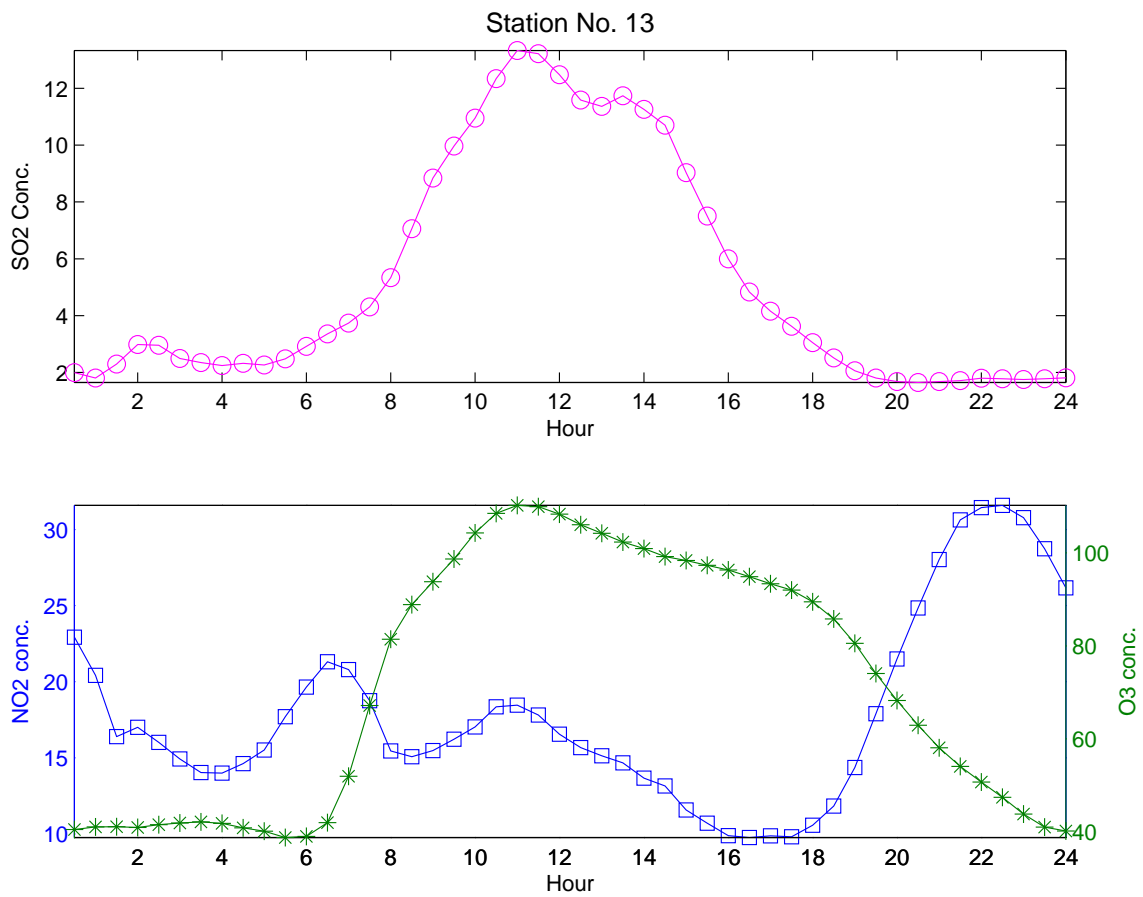

Figure S13: Like Fig. S1 but for station 13.

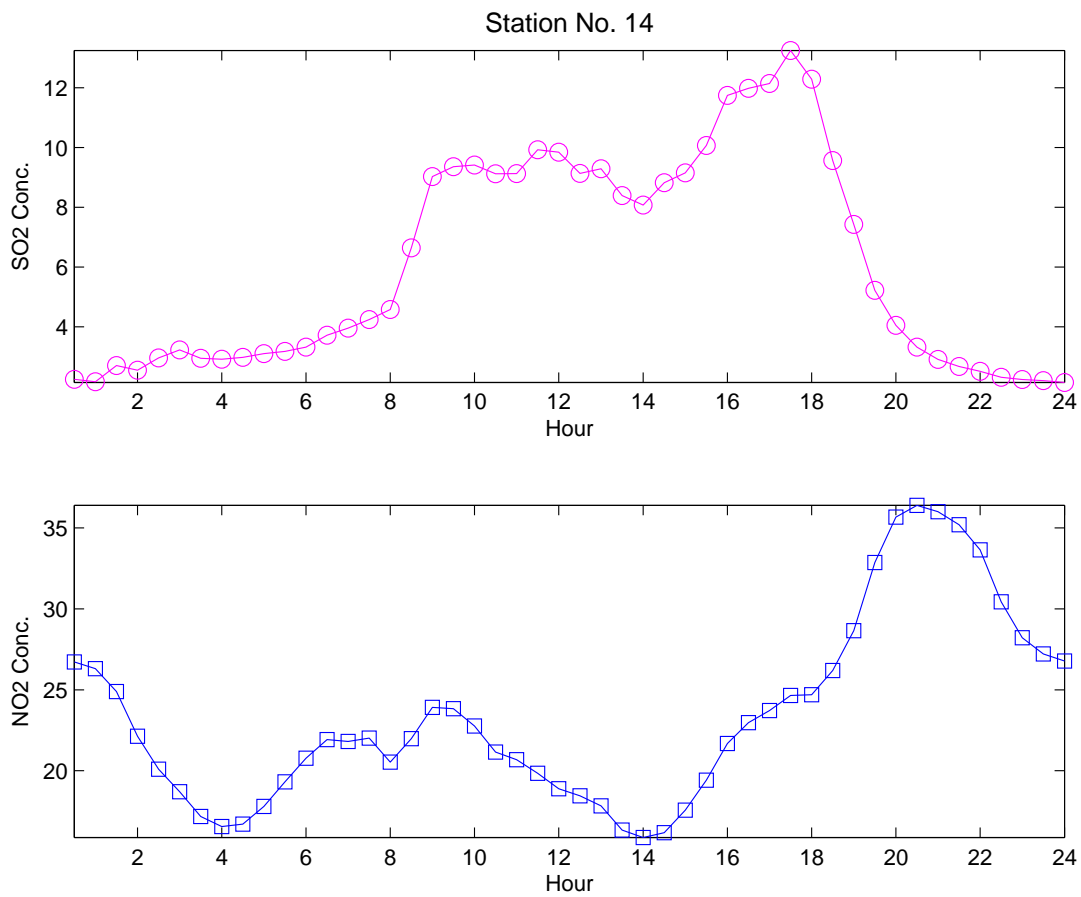

Figure S14: Like Fig. S1 but for station 14.

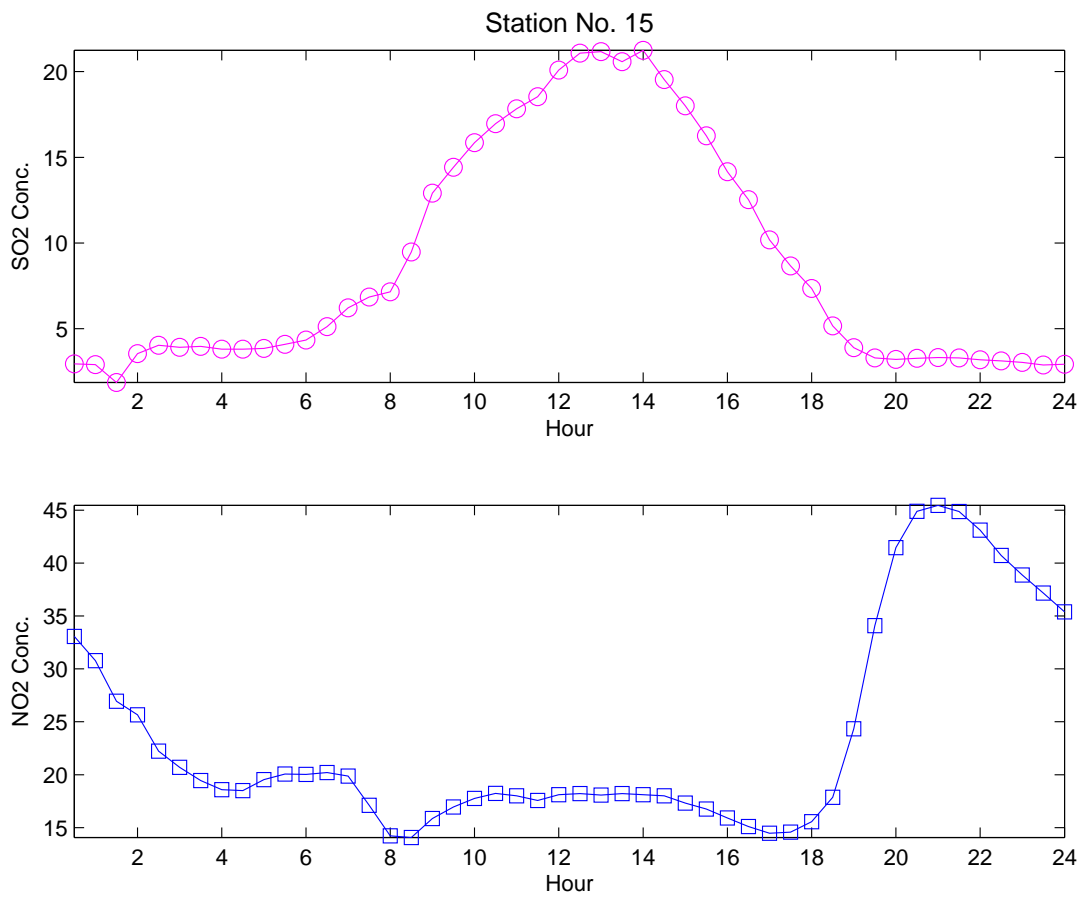

Figure S15: Like Fig. S1 but for station 15.



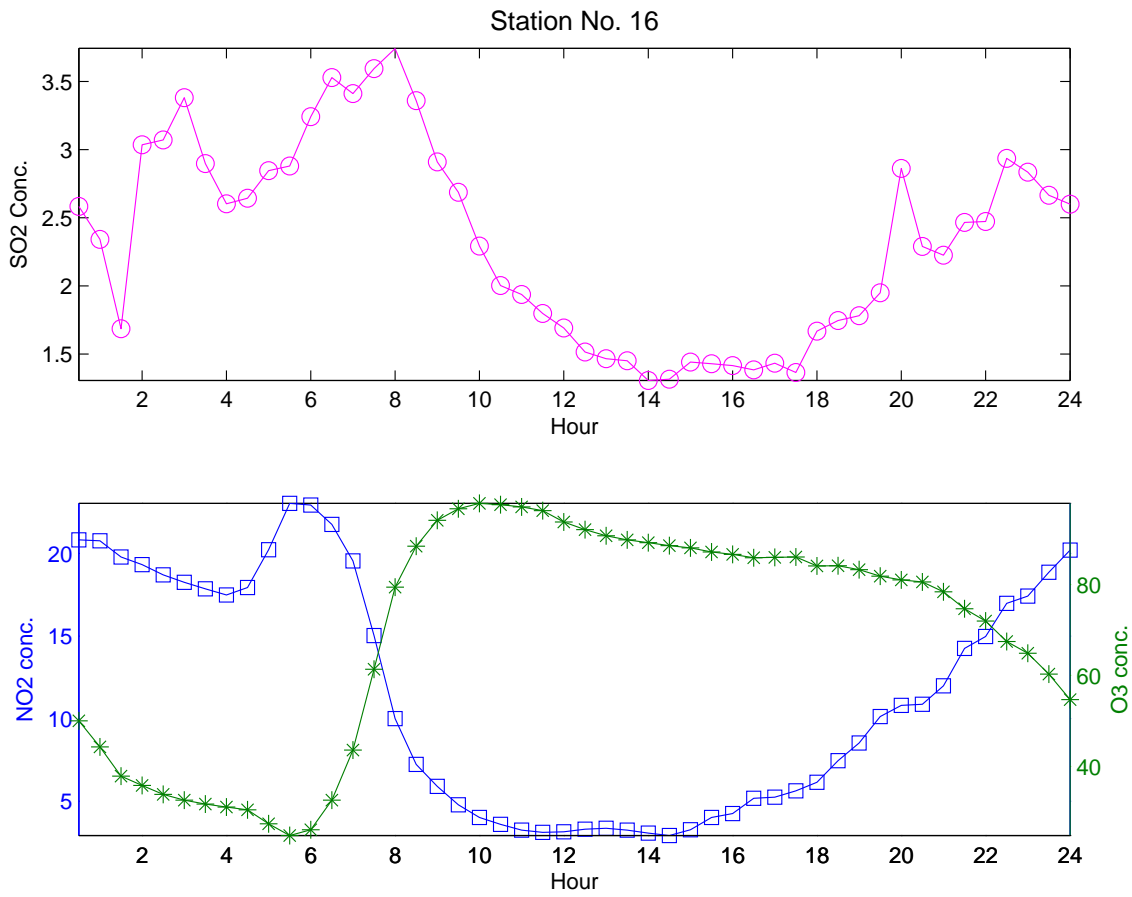

Figure S16: Like Fig. S1 but for station 16.

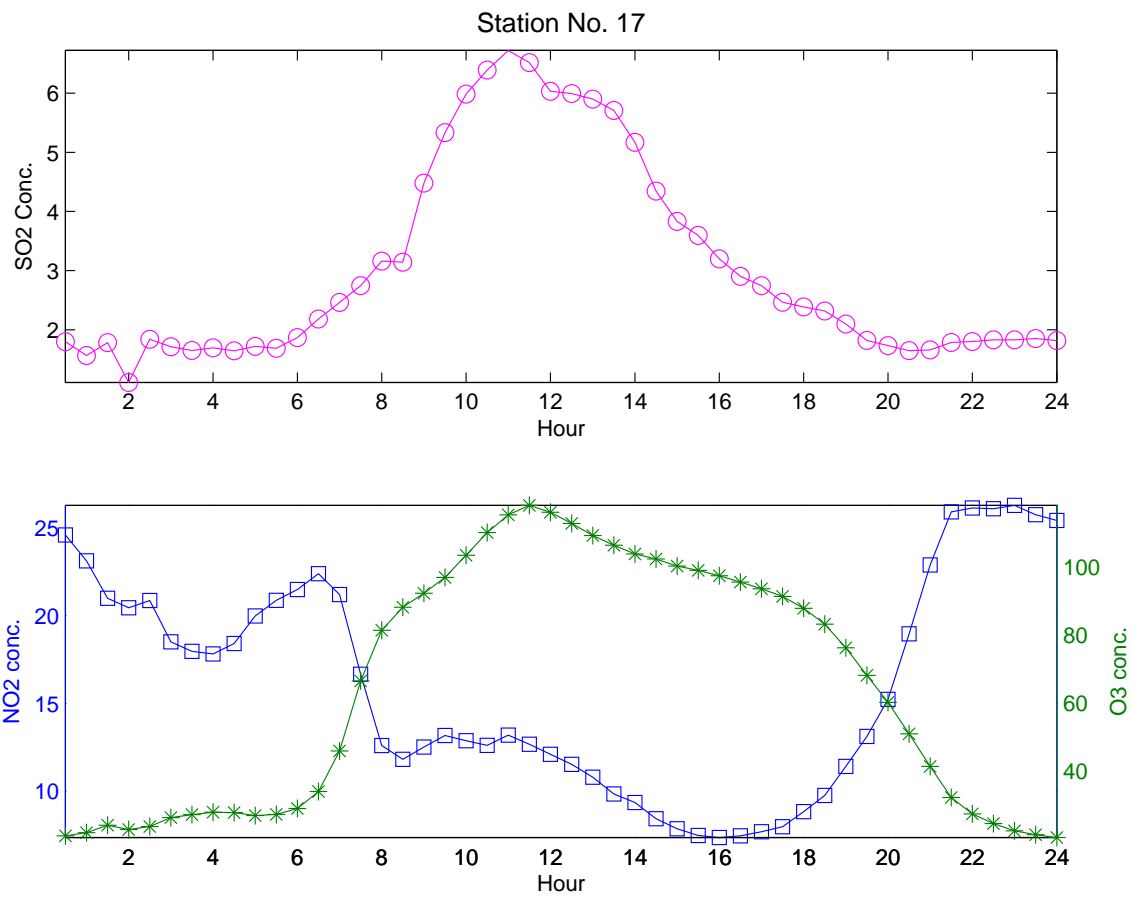

Figure S17: Like Fig. S1 but for station 17.

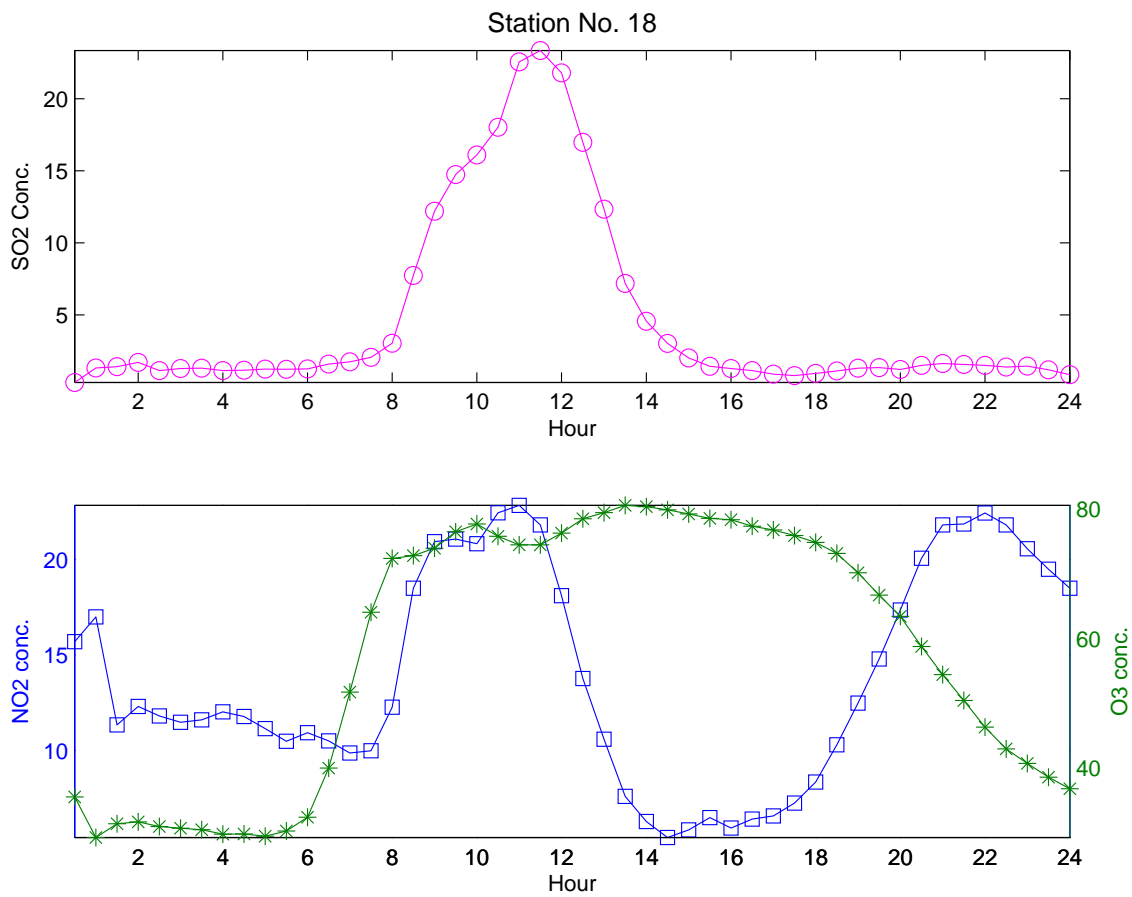

Figure S18: Like Fig. S1 but for station 18.

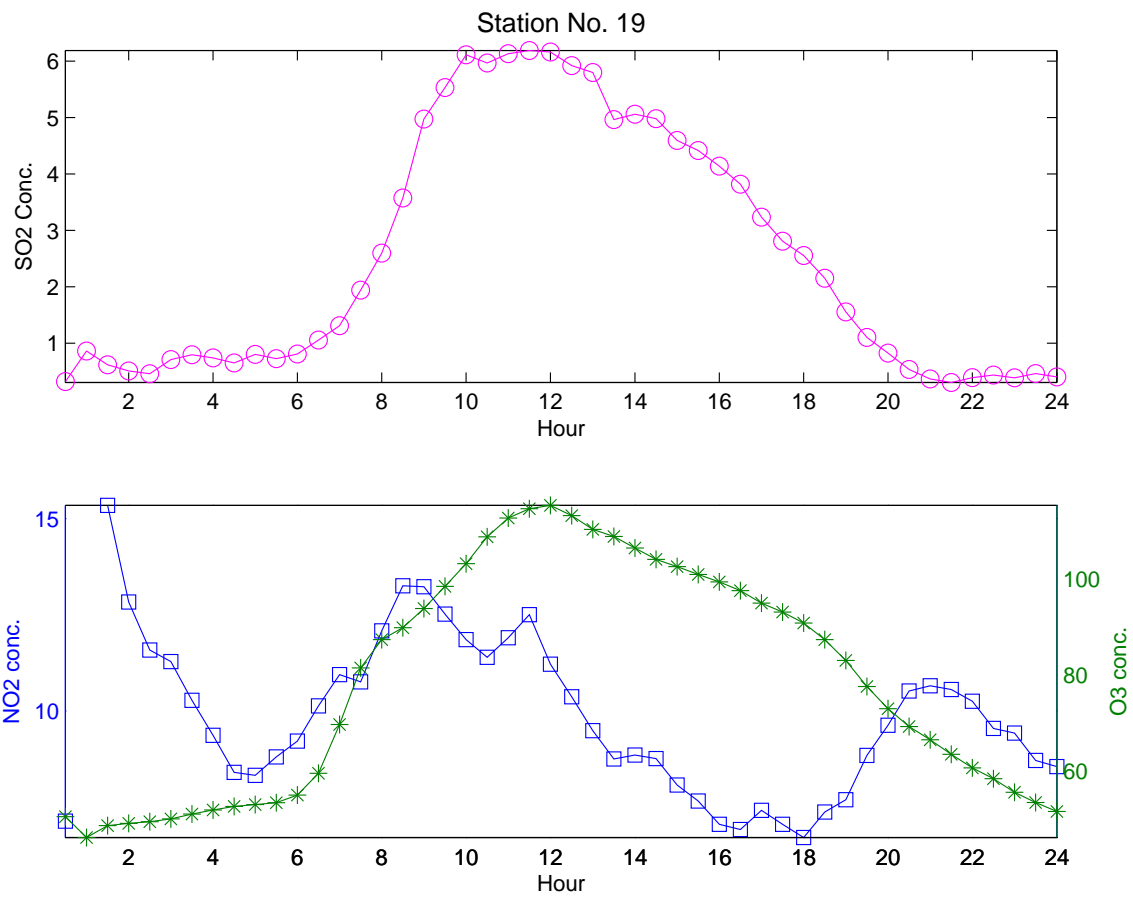

Figure S19: Like Fig. S1 but for station 19.

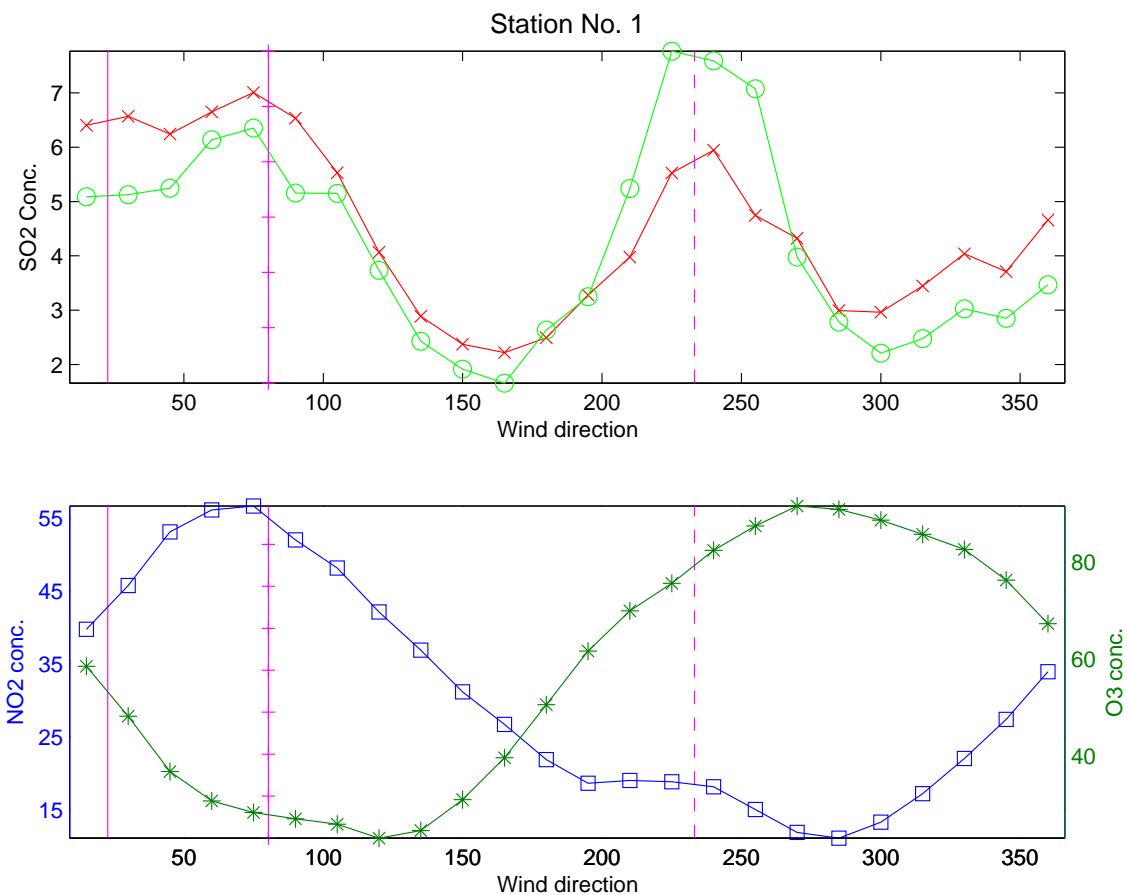

Figure S20: (upper panel) Mean SO<sub>2</sub> concentration ( $\mu\text{g m}^{-3}$ ) as a function of the representative wind direction sectors in station 1. The two curves are for period 1 (x-marks, 1 Jan 2000 to 31 Jan 2004) and for period 2 (circles, 1 Feb 2004 to 31 Dec 2006). (lower panel) Mean NO<sub>2</sub> (squares) and O<sub>3</sub> (stars) concentration ( $\mu\text{g m}^{-3}$ ) as a function of the representative wind direction sectors during the whole study period. The directions from power stations Rotenberg (dashed), Eshkol (continuous) and Tzafit (sectioned) to each station are shown as vertical lines in the two panels.

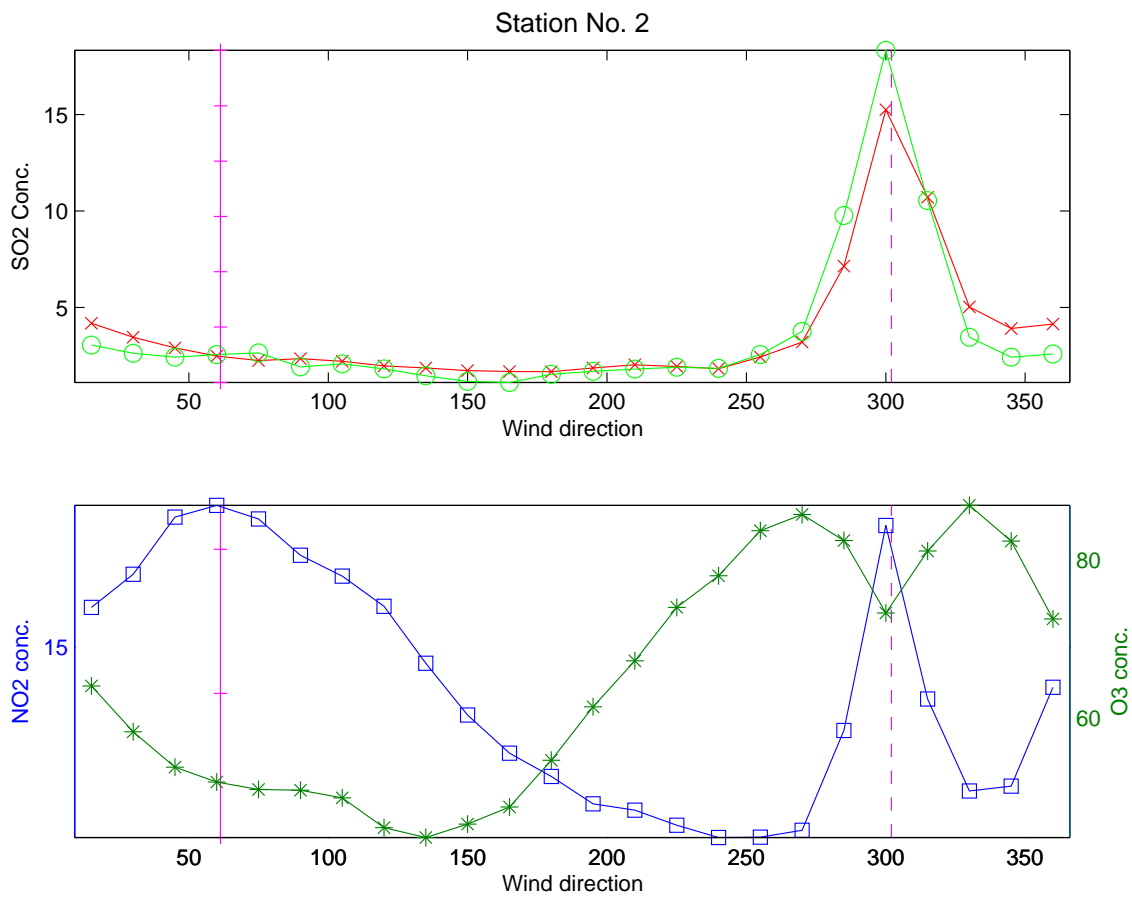

Figure S21: Like Fig. S20 but for station 2.

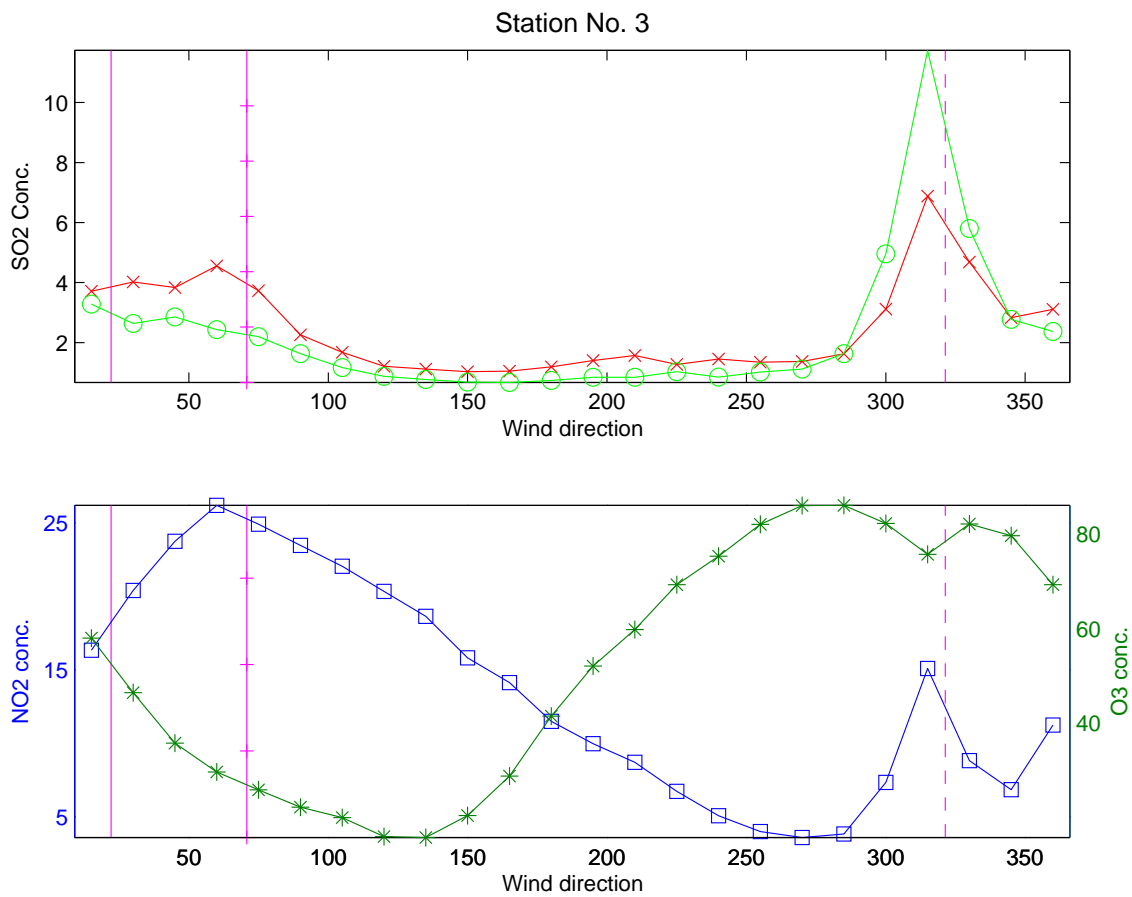

Figure S22: Like Fig. S20 but for station 3.

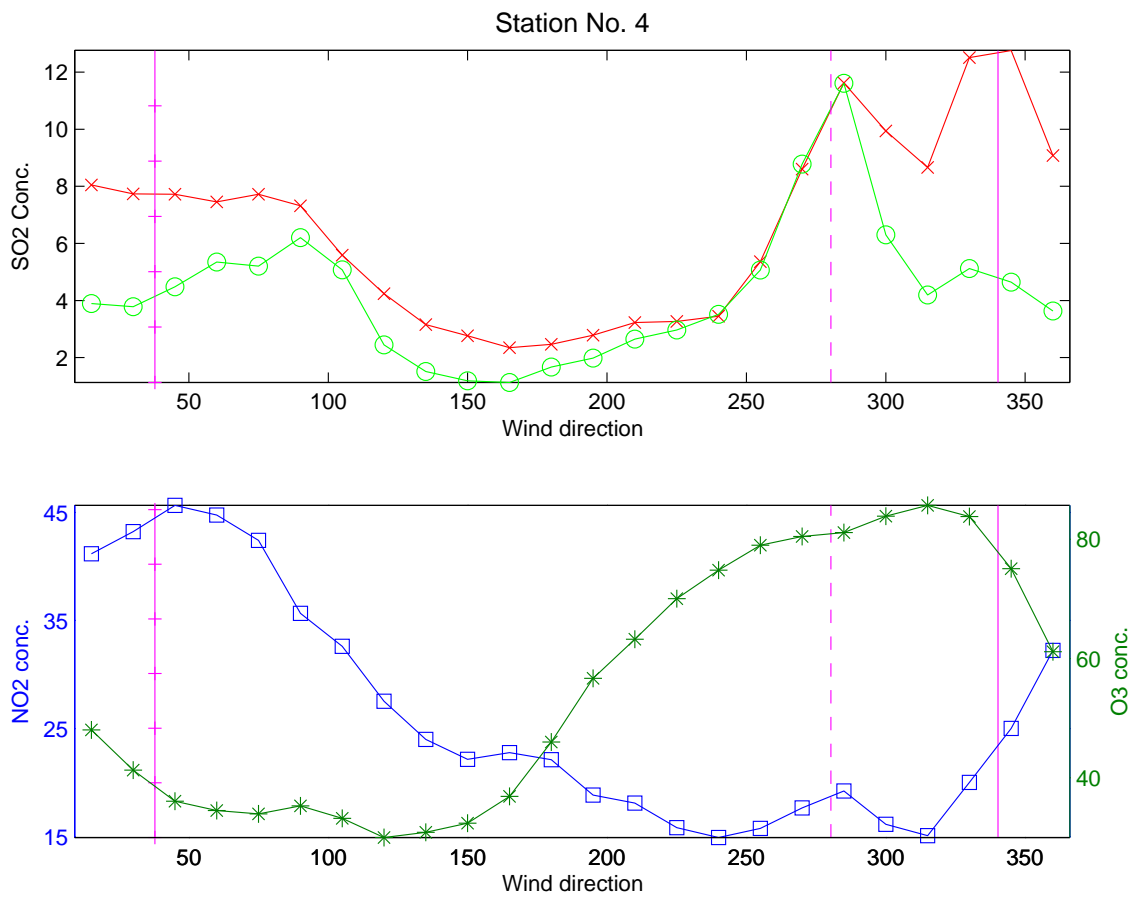

Figure S23: Like Fig. S20 but for station 4.



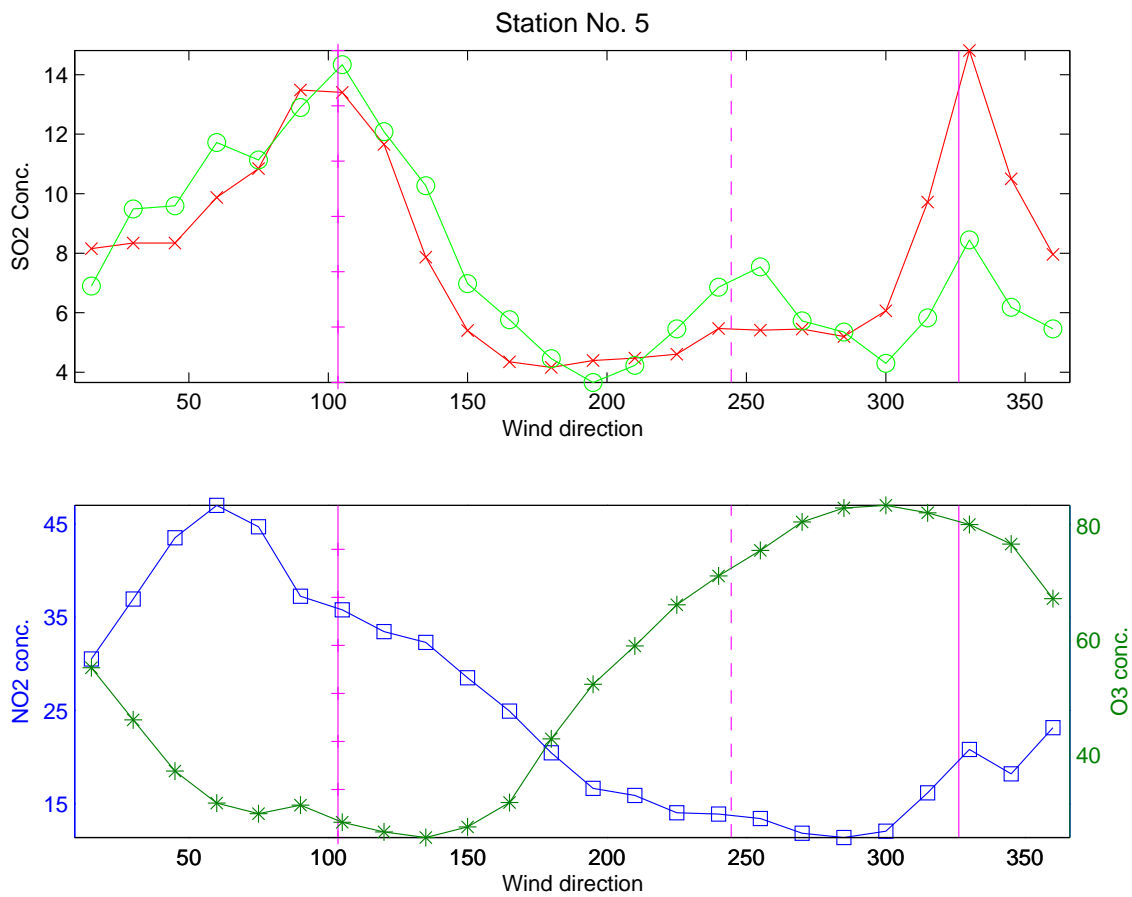

Figure S24: Like Fig. S20 but for station 5.

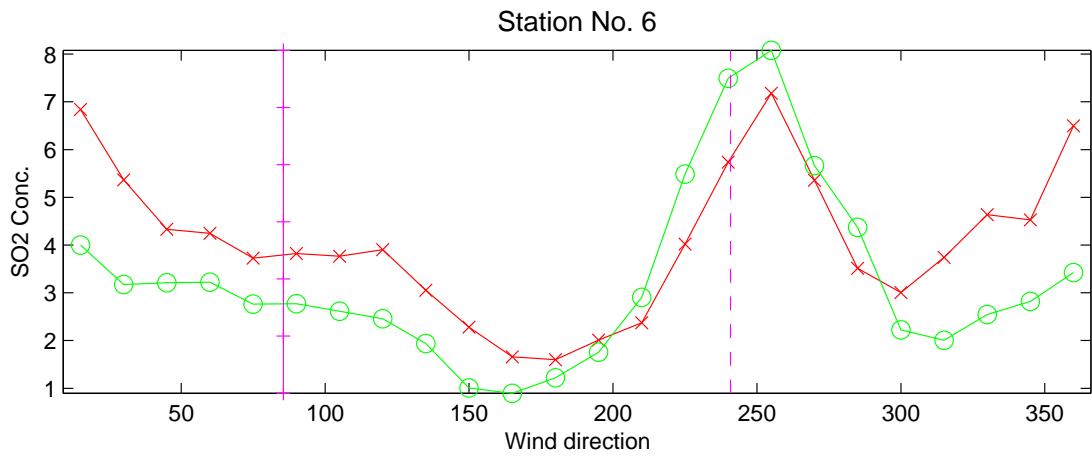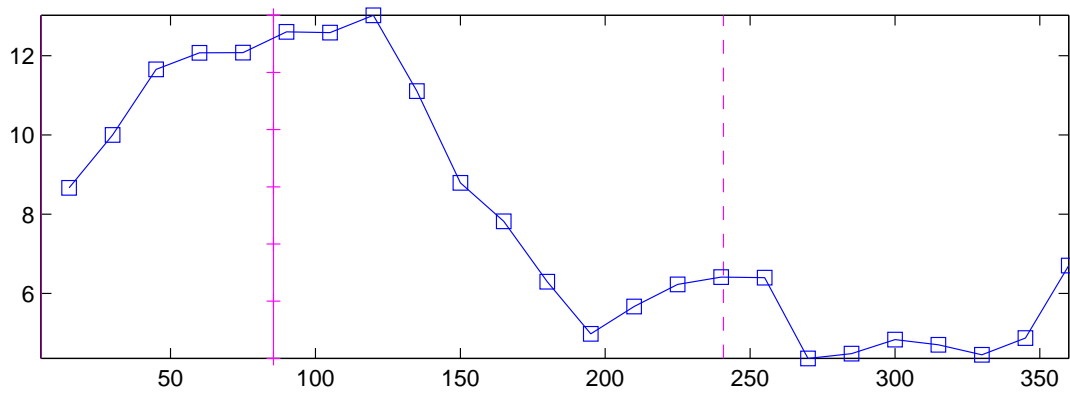

Figure S25: Like Fig. S20 but for station 6.

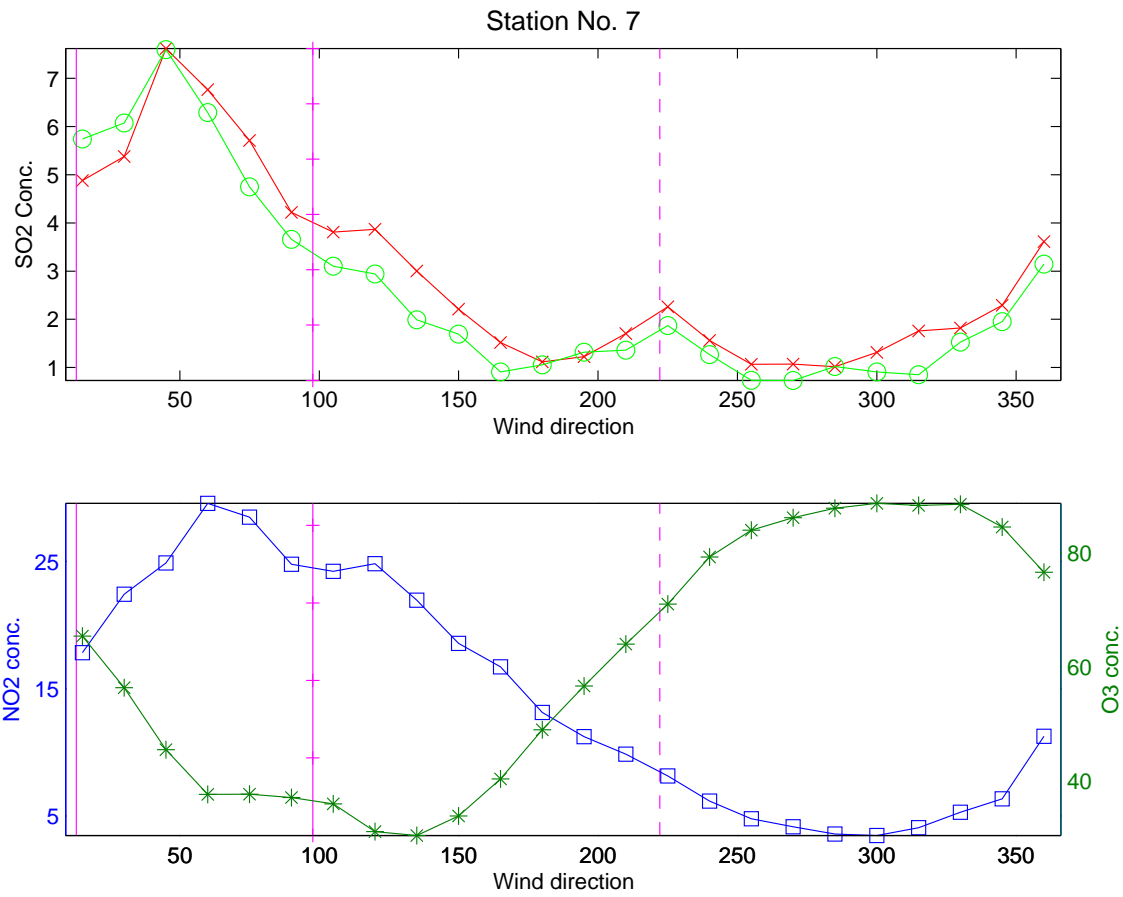

Figure S26: Like Fig. S20 but for station 7.

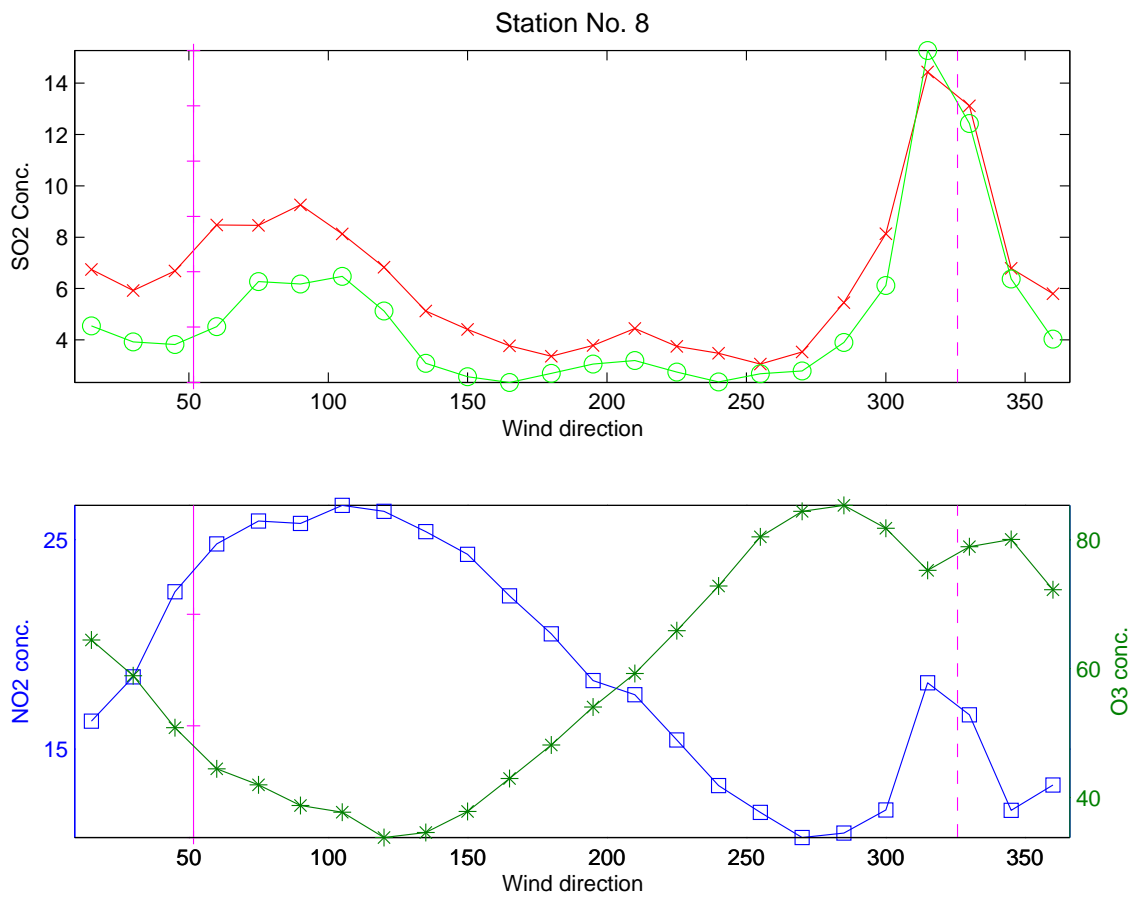

Figure S27: Like Fig. S20 but for station 8.

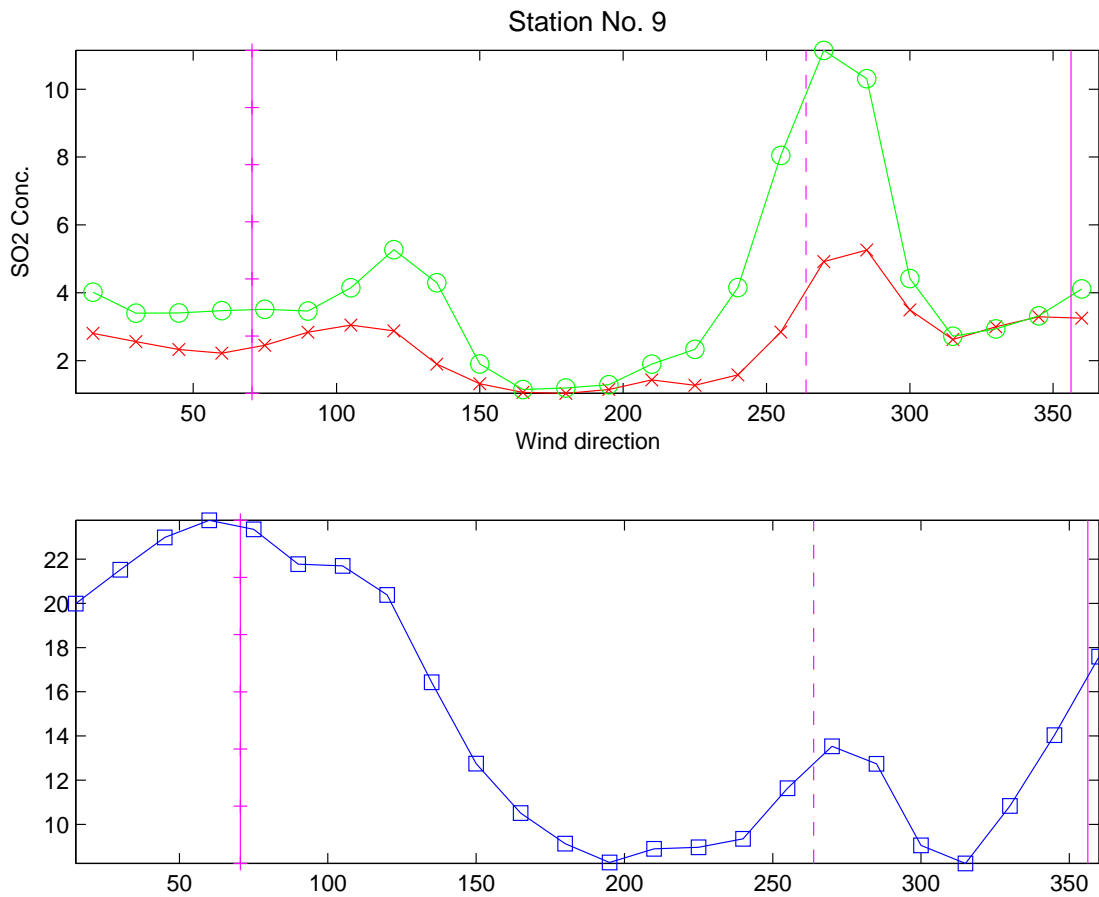

Figure S28: Like Fig. S20 but for station 9.

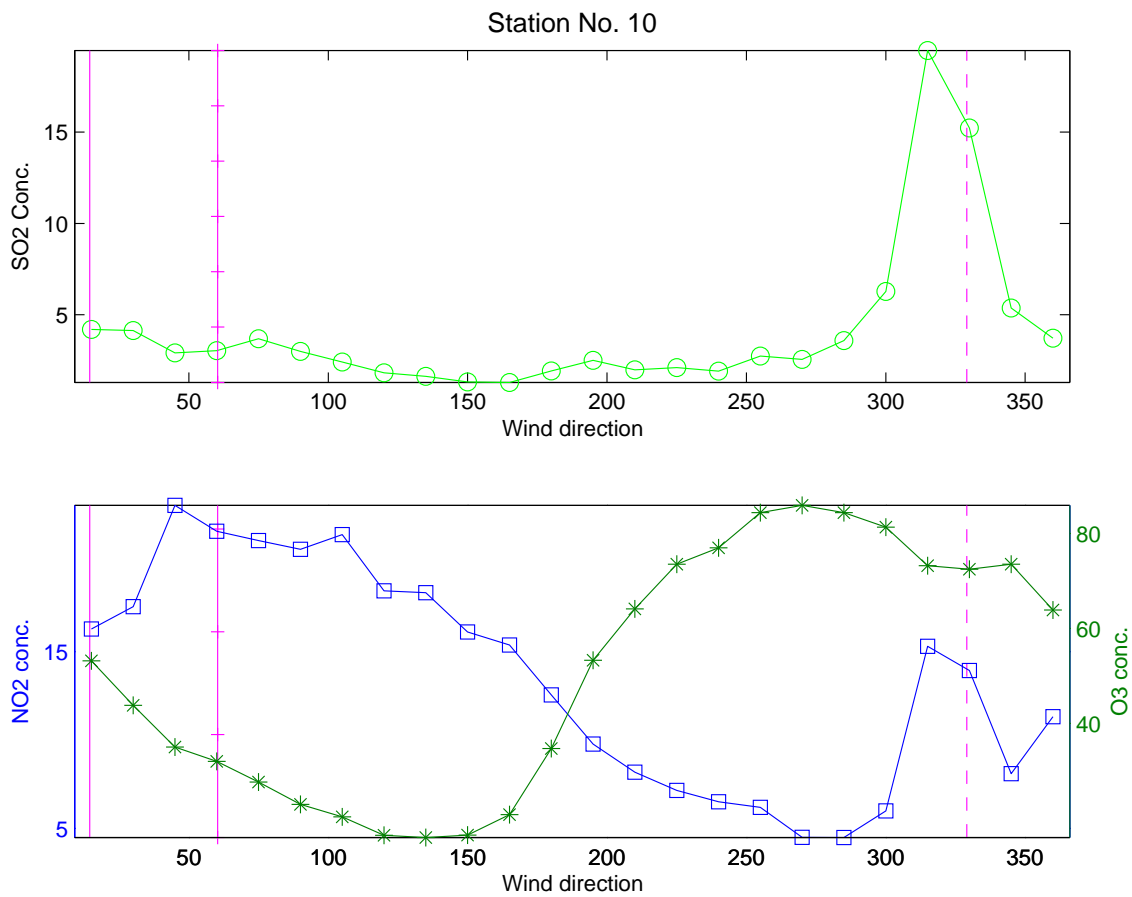

Figure S29: Like Fig. S20 but for station 10.

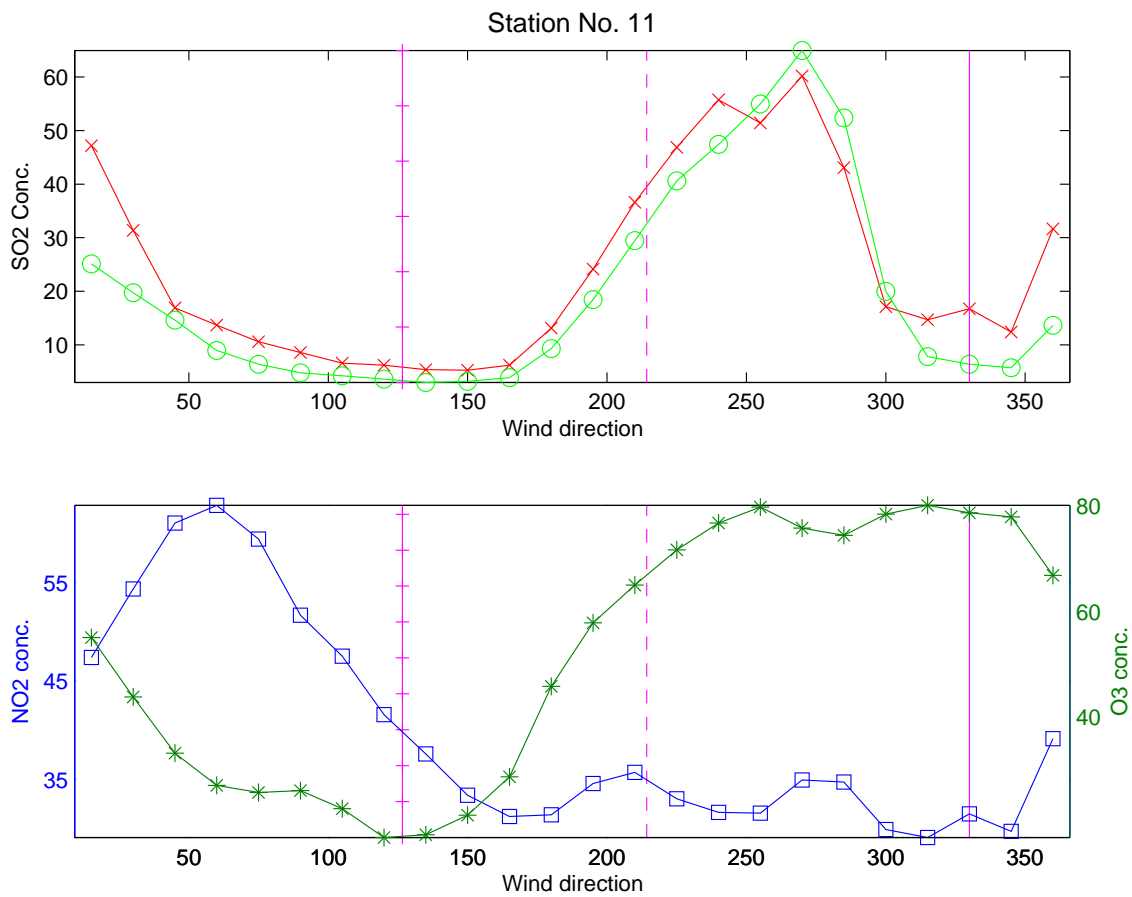

Figure S30: Like Fig. S20 but for station 11.

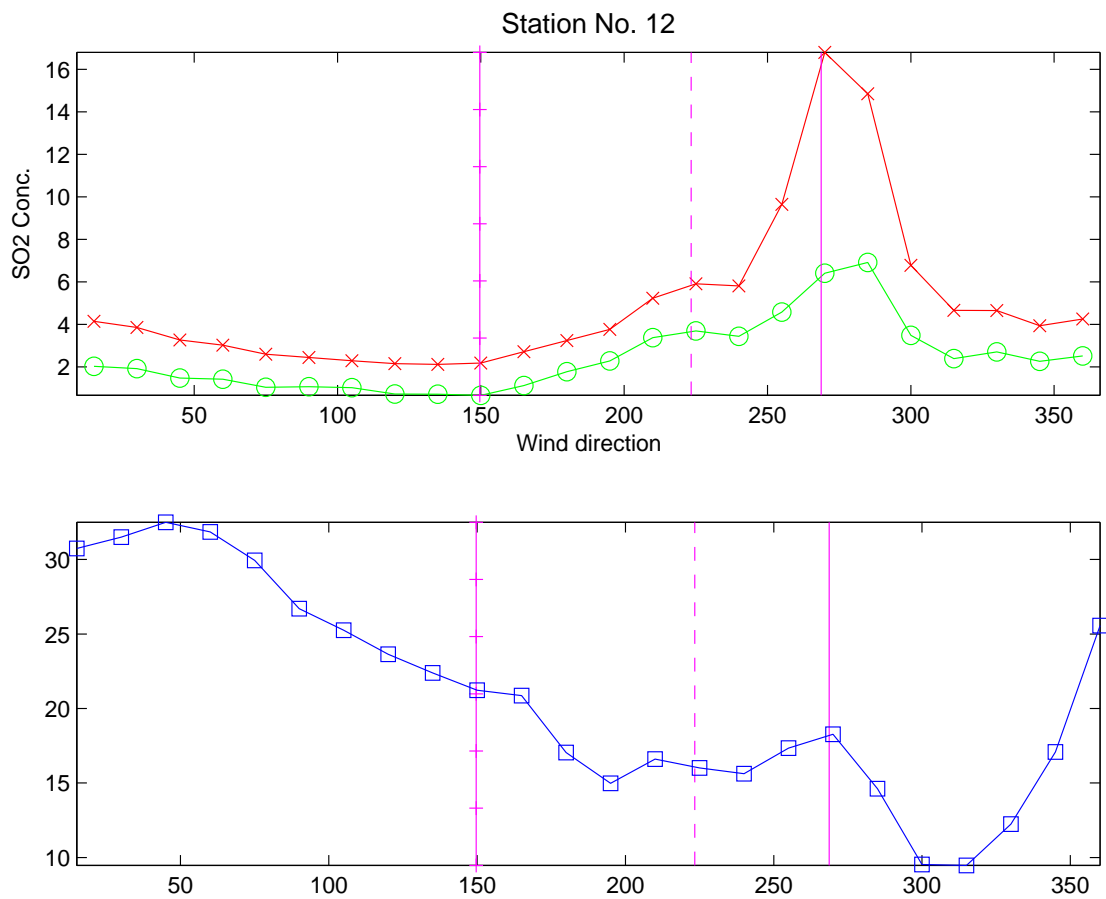

Figure S31: Like Fig. S20 but for station 12.



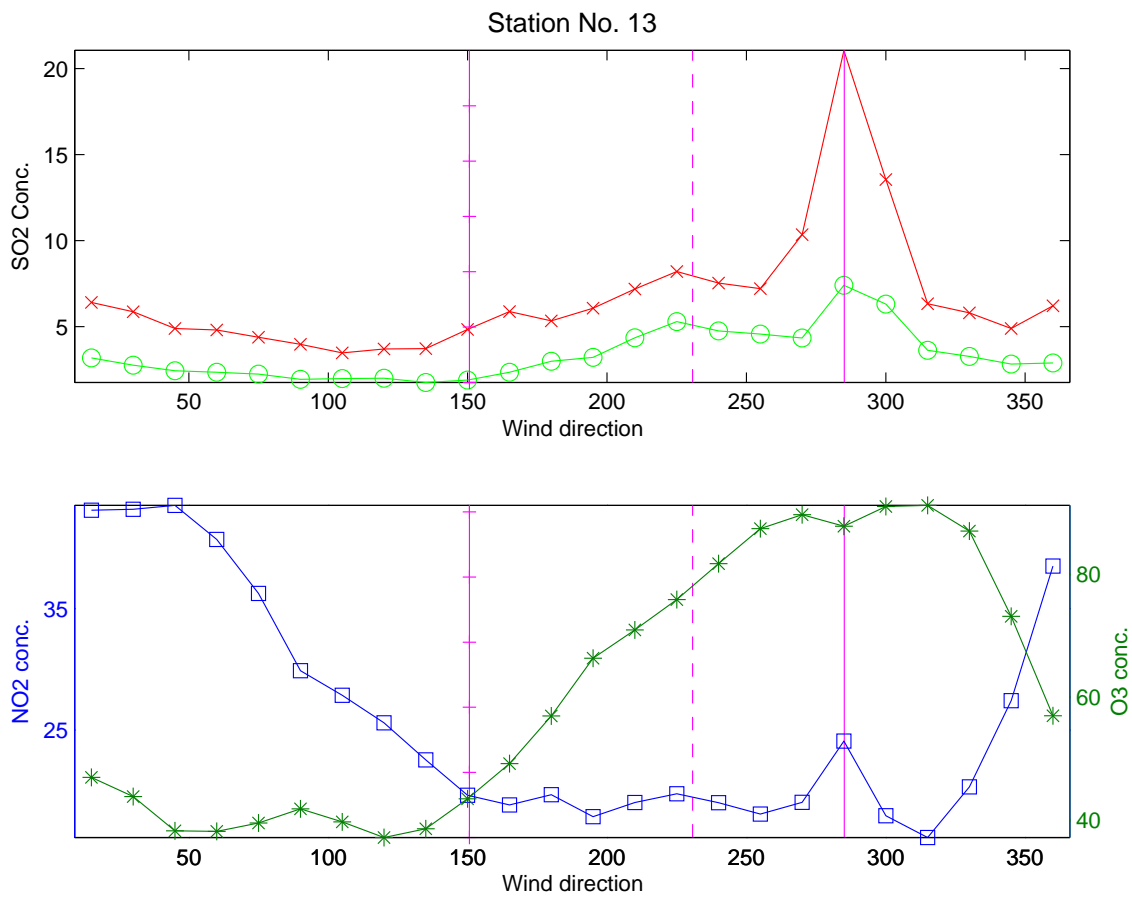

Figure S32: Like Fig. S20 but for station 13.

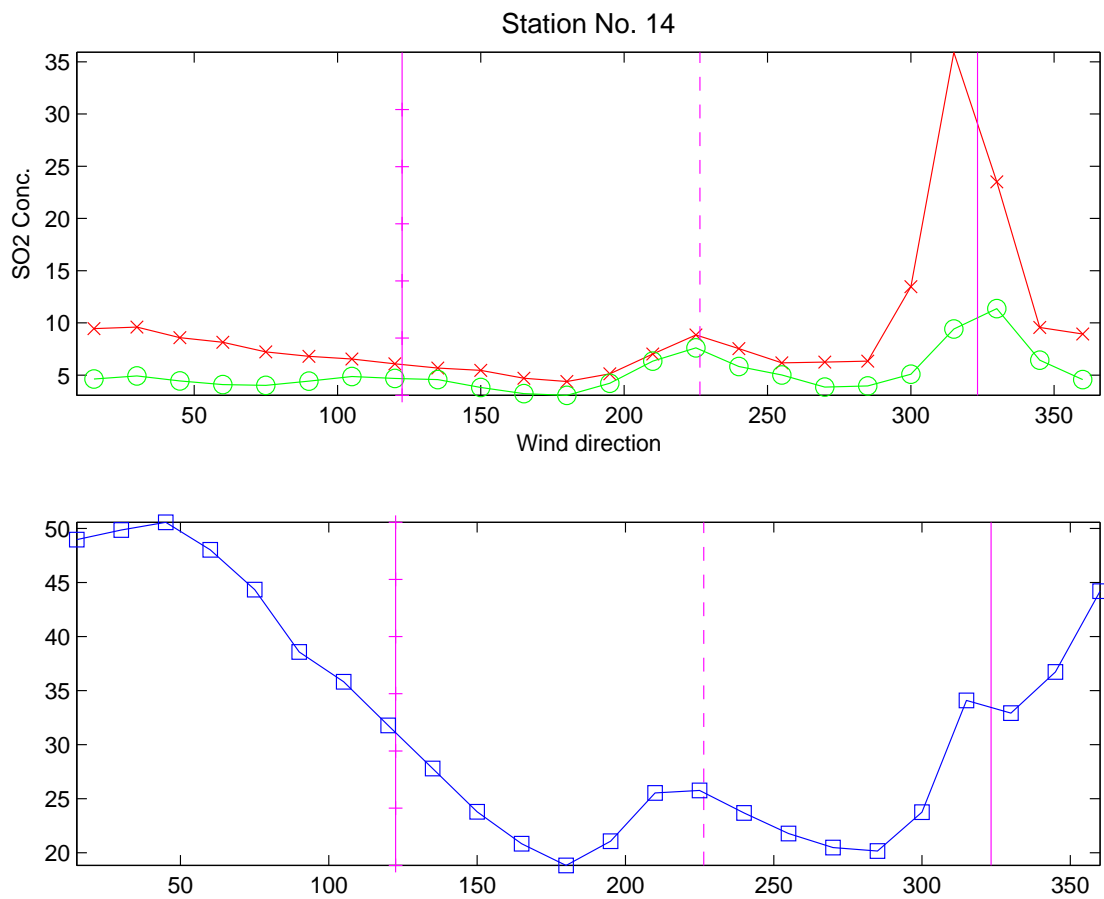

Figure S33: Like Fig. S20 but for station 14.

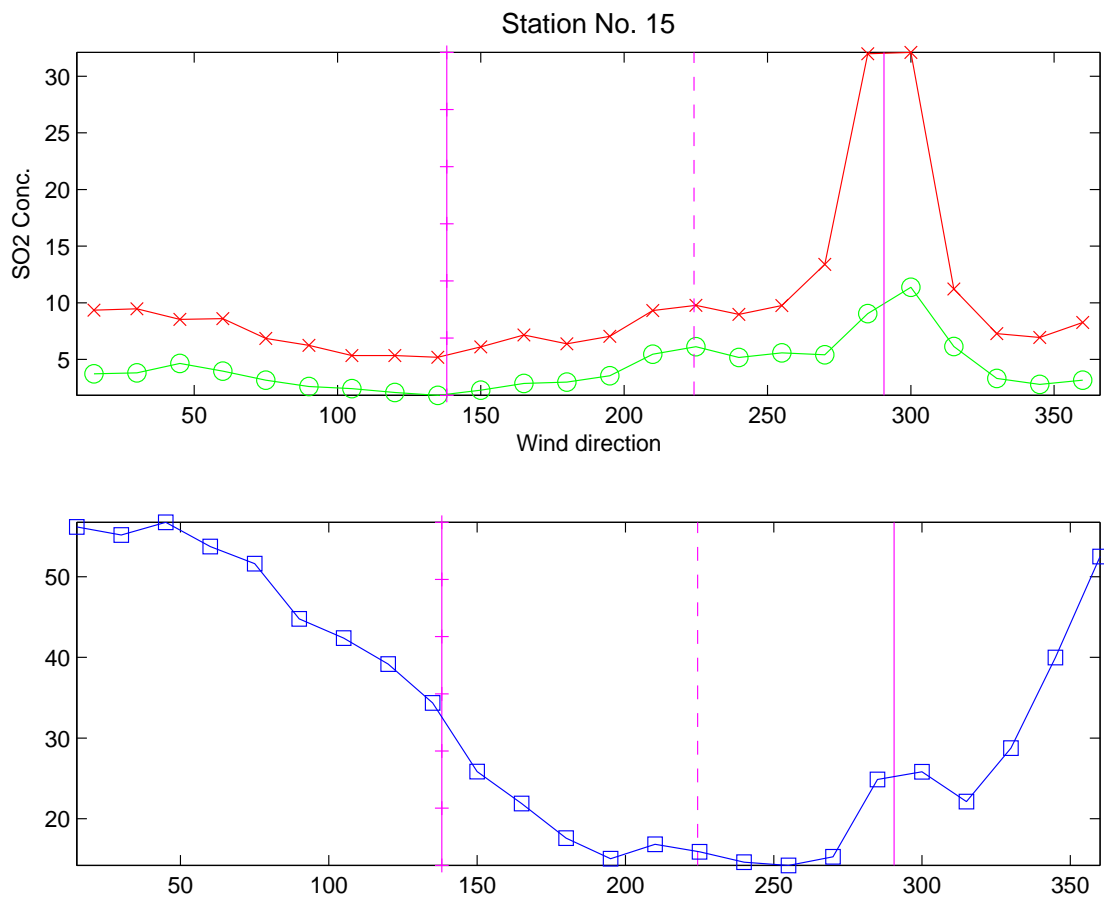

Figure S34: Like Fig. S20 but for station 15.

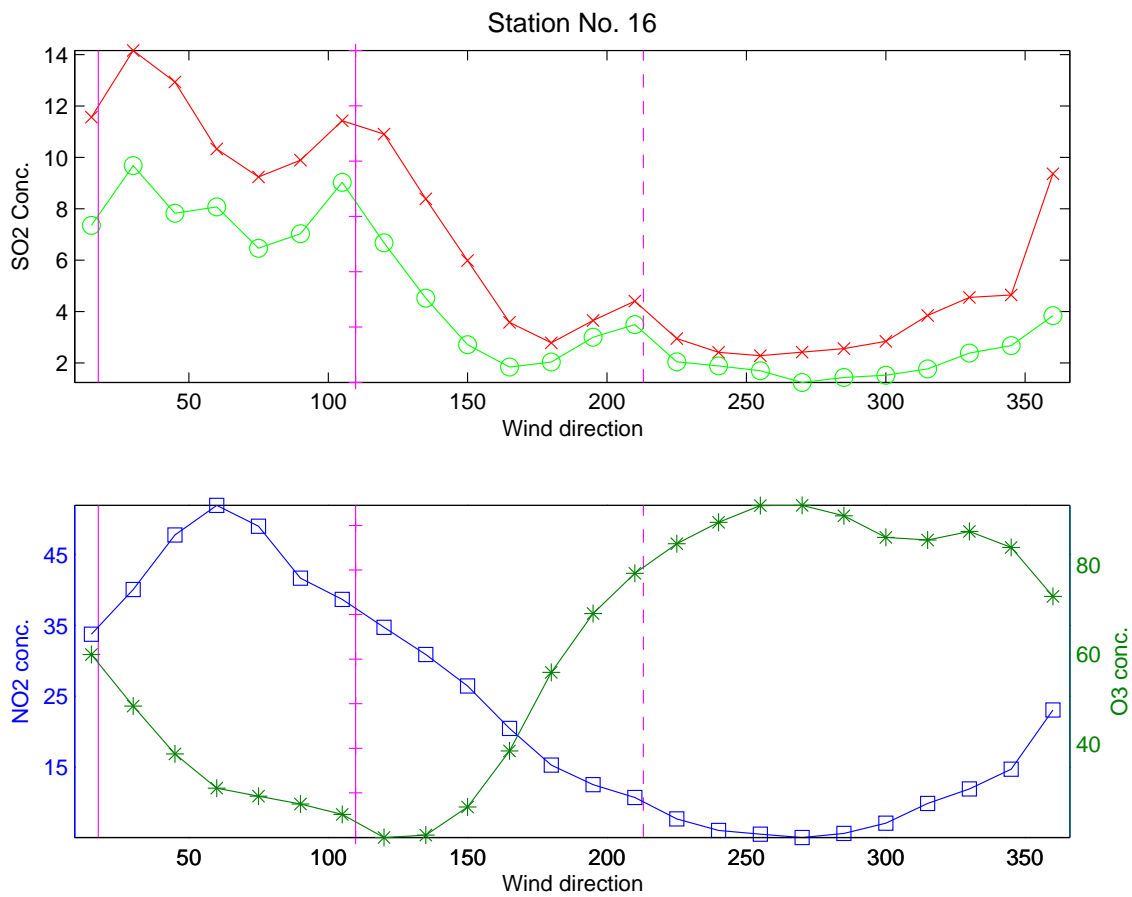

Figure S35: Like Fig. S20 but for station 16.

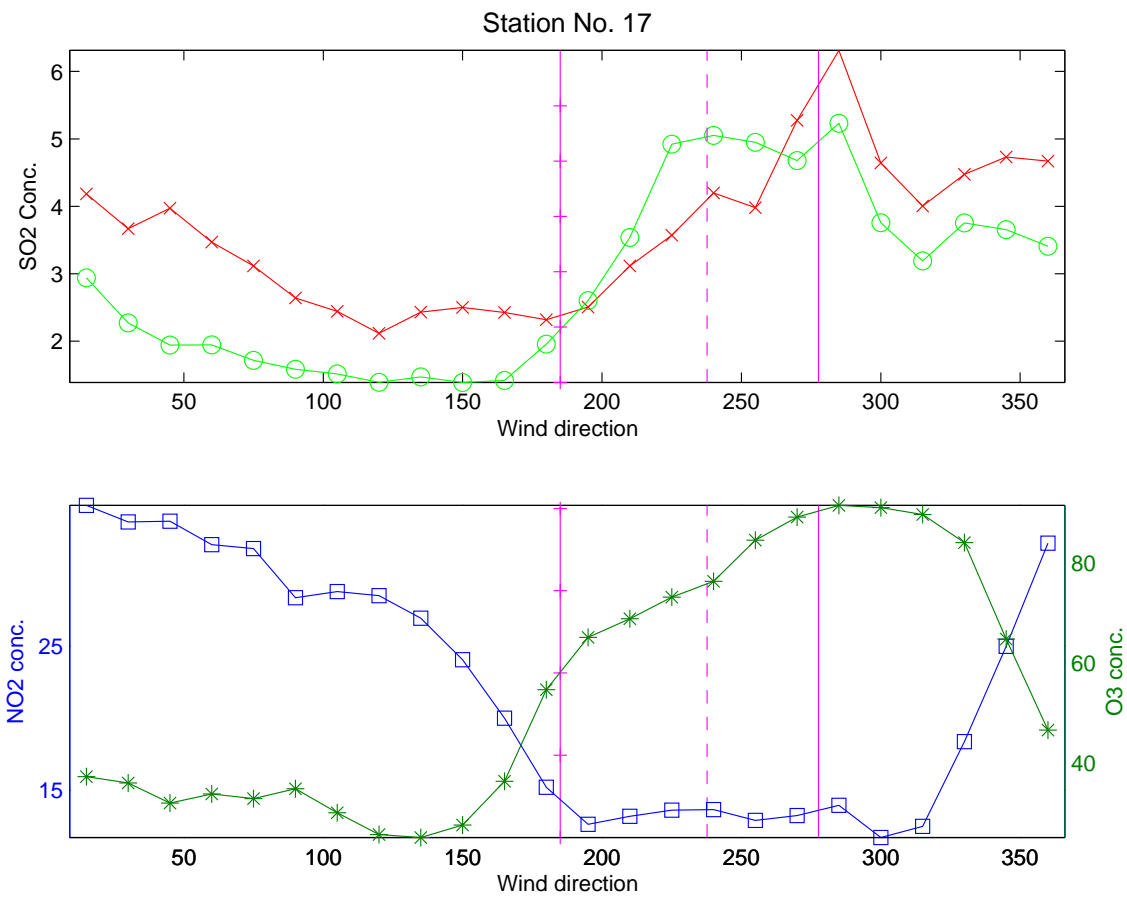

Figure S36: Like Fig. S20 but for station 17.

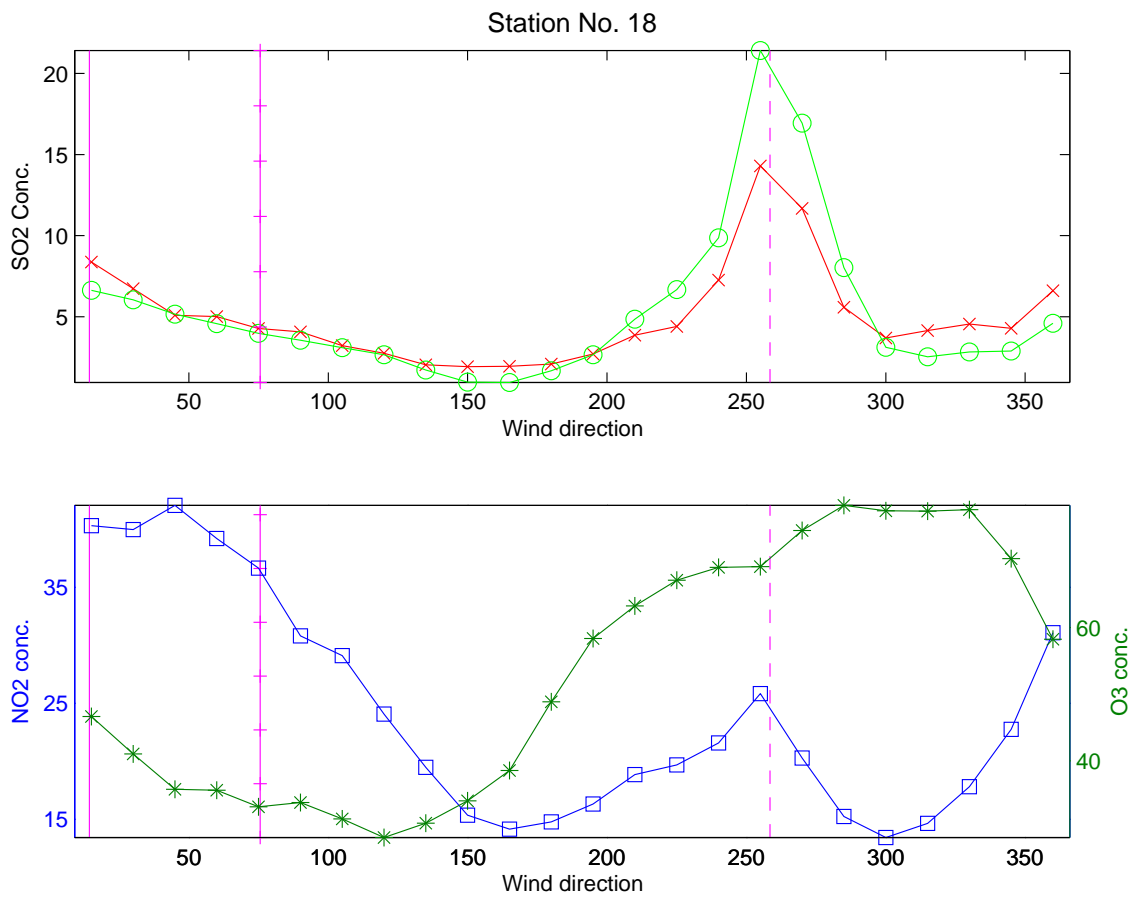

Figure S37: Like Fig. S20 but for station 18.

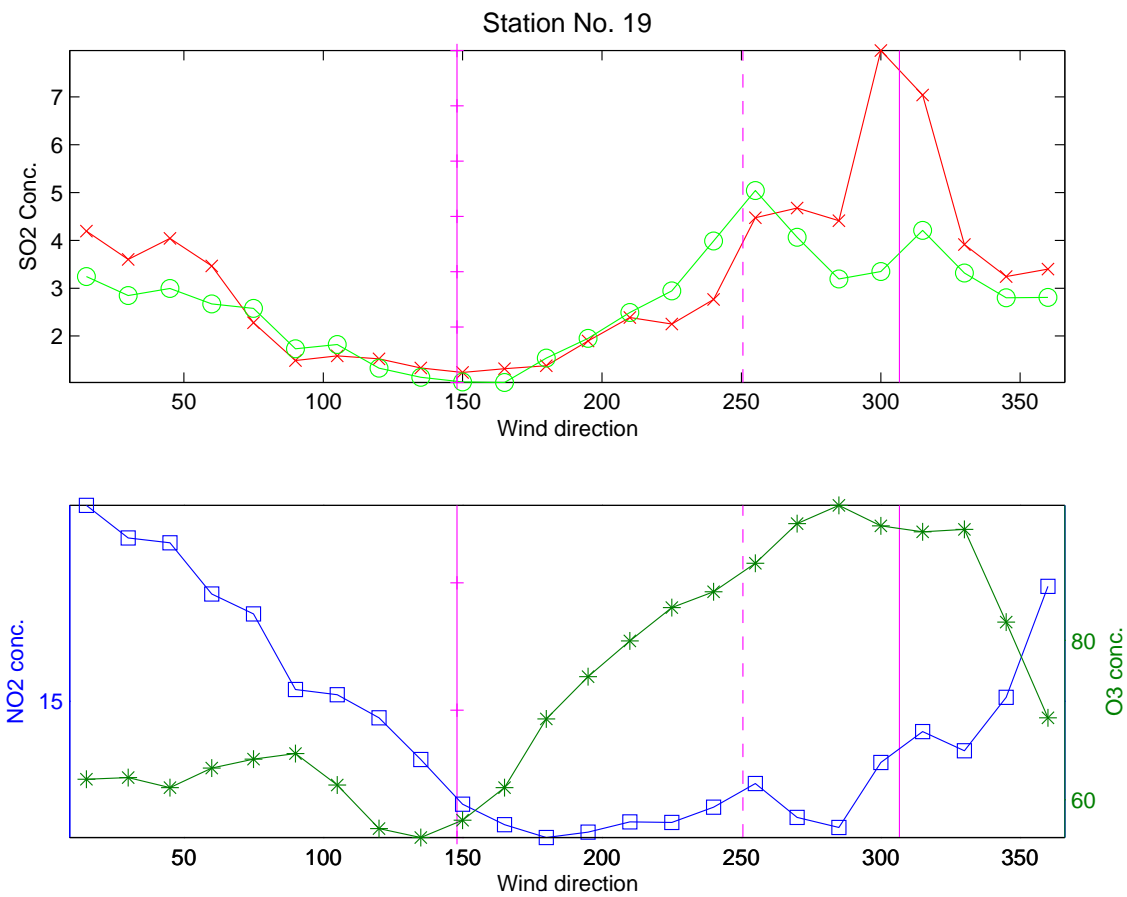

Figure S38: Like Fig. S20 but for station 19.
